# 1 **Randomly incorporated genomic 6mA delays** 2 **zygotic transcription initiation**

3

4 Febrimarsa<sup>1</sup>, Sebastian G Gornik<sup>1†</sup>, Sofia N Barreira<sup>2</sup>, Miguel Salinas-Saavedra<sup>1</sup>, Christine E  
5 Schnitzler<sup>3,4</sup>, Andreas D Baxevanis<sup>2</sup>, Uri Frank<sup>1\*</sup>.

6

7 <sup>1</sup> Centre for Chromosome Biology, School of Biological and Chemical Sciences, University of  
8 Galway, Galway, Republic of Ireland.

9 <sup>2</sup> Computational and Statistical Genomics Branch, Division of Intramural Research, National  
10 Human Genome Research Institute, National Institutes of Health, Bethesda, MD 20892, USA.

11 <sup>3</sup> Whitney Laboratory for Marine Bioscience, University of Florida, St. Augustine, FL 32080,  
12 USA.

13 <sup>4</sup> Department of Biology, University of Florida, Gainesville, FL 32611, USA.

14 † Present address: Centre of Organismal Studies (COS), Heidelberg University, Heidelberg  
15 69120, Germany.

16 \*email: [uri.frank@nuigalway.ie](mailto:uri.frank@nuigalway.ie)

17 **SUMMARY**

18 N6-methyldeoxyadenosine (6mA) is a chemical alteration of DNA, observed across all realms  
19 of life. The functions of 6mA are well understood in bacteria but its roles in animal genomes  
20 have been controversial. We show that 6mA randomly accumulates in early embryos of the  
21 cnidarian *Hydractinia symbiolongicarpus*, with a peak at the 16-cell stage followed by  
22 clearance to background levels two cell cycles later, at the 64-cell stage – the embryonic stage  
23 at which zygotic genome activation occurs in this animal. Knocking down *Alkbh1*, a putative  
24 initiator of animal 6mA clearance, resulted in higher levels of 6mA at the 64-cell stage and a  
25 delay in the commencement of zygotic transcription. Our data are consistent with 6mA  
26 originating from recycled nucleotides of degraded m6A-marked maternal RNA post-  
27 fertilization. Therefore, while 6mA does not function as an epigenetic mark in *Hydractinia*, its  
28 random incorporation into the early embryonic genome inhibits transcription. *Alkbh1* functions  
29 as a genomic 6mA ‘cleaner’, facilitating timely zygotic genome activation. Given the random  
30 nature of genomic 6mA accumulation and its ability to interfere with gene expression, defects  
31 in 6mA clearance may represent a hitherto unknown cause of various pathologies.

32

33

## 34 INTRODUCTION

35 Methylation of adenine in DNA (6mA) and the functions it fulfils are well documented in  
36 bacteria (Geier and Modrich, 1979; Haagmans and van Der Woude, 2000; Lahue et al., 1987;  
37 Slater et al., 1995) and protists (Beh et al., 2019; Wang et al., 2019), but studies on this DNA  
38 modification in animals have revealed conflicting reports (Bochtler and Fernandes, 2020;  
39 Douvlataniotis et al., 2020; Kong et al., 2022). Low levels of 6mA were reported in the  
40 genomes of flies (He et al., 2019; Yao et al., 2018; Zhang et al., 2015), worms (Greer et al.,  
41 2015; O'Brown et al., 2019), fish (Liu et al., 2016; O'Brown *et al.*, 2019), and mammalian cells  
42 (Koziol et al., 2016; Wu et al., 2016; Xiao et al., 2018; Xie et al., 2018), and were shown to  
43 correlate with transposon transcripts level in flies and mouse cells (Wu *et al.*, 2016; Xie *et al.*,  
44 2018; Zhang *et al.*, 2015). However, some of these studies were challenged by others,  
45 attributing their findings to antibody artifacts (Abakir et al., 2020; Douvlataniotis *et al.*, 2020)  
46 or to bacterial contamination (Kong *et al.*, 2022; O'Brown *et al.*, 2019; Schiffers et al., 2017).  
47 To address this apparent discrepancy, we have studied 6mA during early embryogenesis of  
48 *Hydractinia symbiolongicarpus*, a member of the early-diverging phylum Cnidaria. As a sister  
49 group to Bilateria, cnidarians may provide new insights into the evolution of animal traits. We  
50 report a peak in the level of 6mA in 16-cell stage embryos. However, 6mA marks were  
51 randomly distributed in the genome, inconsistent with having an epigenetic function. We find  
52 that the clearance of 6mA before the 64-cell stage by the dioxygenase Alkbh1 is necessary for  
53 timely zygotic genome activation (ZGA). We propose that 6mA is passively and randomly  
54 accumulated in the genome due to the rapid degradation of m6A-marked maternal RNA, NTP-  
55 dNTP conversion by ribonucleotide reductase, and random integration into the early embryonic  
56 genome.

57

## 58 RESULTS

### 59 Dynamics and distribution of 6mA during embryogenesis

60 To quantitatively assess 6mA levels in *Hydractinia*, we extracted genomic DNA from adult  
61 specimens and from different embryonic stages. The samples were then enzymatically digested  
62 and purified. Synthetic oligonucleotides containing 6mA were similarly treated and used as  
63 external standards for ultra-high-performance liquid chromatography coupled with triple-  
64 quadrupole tandem mass spectrometry (UHPLC-QQQ) (Figure 1A). We found that the levels  
65 of 6mA were at background level in sperm (~0.015% 6mA/dA mol/mol) and slightly above

66 background at the two-cell stage, but increased gradually to ~0.06% in 16-cell stage embryos.  
 67 Levels of 6mA rapidly decreased to background level by the 64-cell stage and were maintained  
 68 at this level to adulthood, being indistinguishable from the negative control (Figure 1B). We  
 69 re-analyzed the level of 6mA/dA in 16- and 64-cell stage embryos by ultra-high performance  
 70 liquid chromatography coupled with quadrupole ion trap tandem-mass spectrometry (UHPLC-  
 71 QTRAP) using stable isotope-labeled [<sup>3</sup>D<sub>1</sub>]-6mA as an internal standard for sample enrichment  
 72 and quantitation (Figure 1A). This method enabled us to detect 6mA/A levels of 0.01% as  
 73 being distinct from the negative control (Figure 1C and S1A) and confirmed the 6mA data at  
 74 the 16- and 64-cell stages obtained by HPLC-QQQ (Figure 1B-C). Hence, 6mA levels are  
 75 dynamic in early embryos, being low in early embryos, high at the 16-cell stage, and low again  
 76 at the 64-cell stage and later (Figure 1B-C).

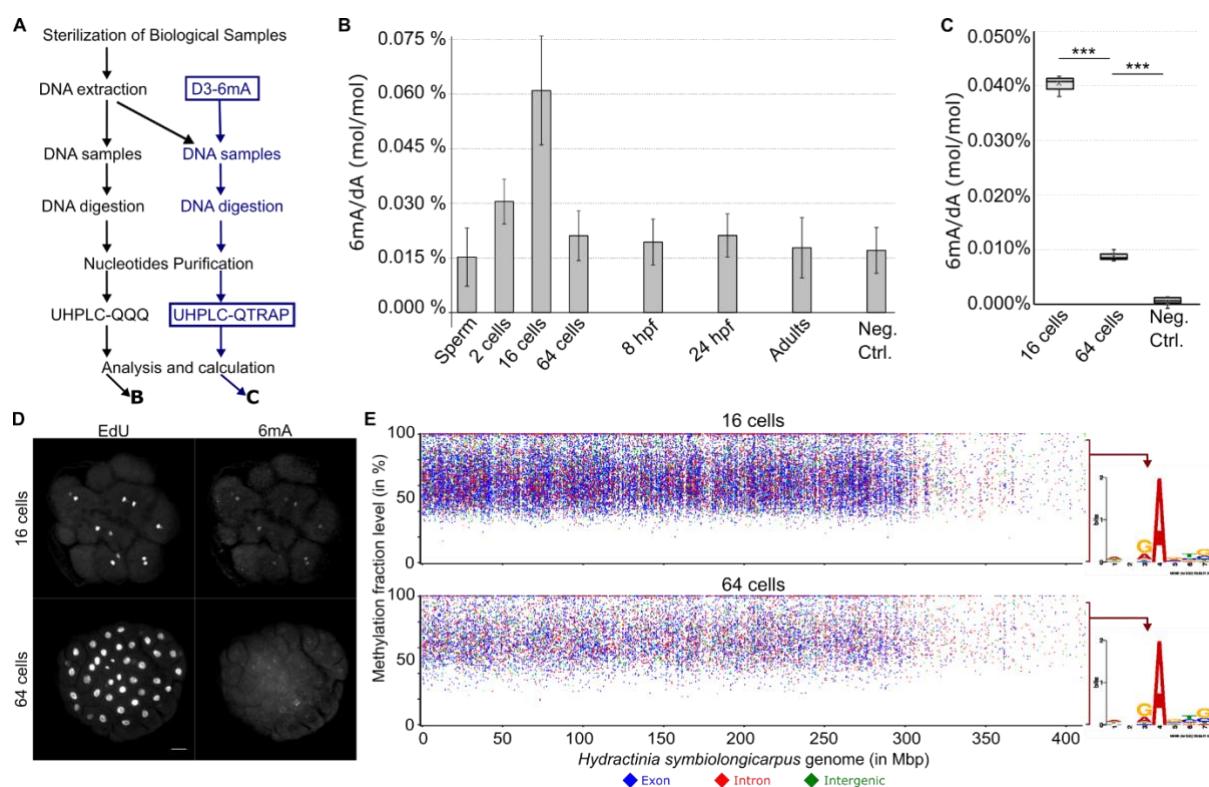

**Figure 1. The dynamics and distribution of 6mA during *Hydractinia* early embryogenesis.** **A.** Schematic of two independent methods to measure 6mA/dA levels: UHPLC-QQQ and UHPLC-QTRAP with D3-6mA internal standard (in blue). **B.** Levels of 6mA/dA (mol/mol) from seven stages of *Hydractinia* development measured by UHPLC-QQQ, calculated using external standard curve. **C.** UHPLC-QTRAP detection of 6mA/dA levels of *Hydractinia* genome from 16- and 64-cells embryos. **D.** Whole-mount immunofluorescence of 6mA from 16- and 64-cell stages of *Hydractinia*. **E.** Distribution of A sites that were detected to be methylated in the genomes of 16- and 64-cell stage, plotted against the percentage of SMRT-seq reads that showed methylation at each site. Consensus

sequences of 6mA sites where the methylation level is between 0-95% are shown right to the graph, indicating that no motif can be deduced.

77 To rule out the possibility of bacterial contamination with high amounts of 6mA, we used an  
78 anti-6mA antibody for immunofluorescence (IF) in fixed embryos. The 6mA signal was visible  
79 in nuclei of *Hydractinia* cells (Figure 1D & S1B) and could be abolished by DNase treatment,  
80 but not by RNase treatment (Figure S1C); this observation is consistent with methylation of  
81 the animal's nuclear DNA.

82 Next, we performed single-molecule real-time sequencing (SMRT-Seq) to investigate the  
83 distribution of 6mA in the genome of 16- and 64-cell stage embryos and adults. The data of  
84 methylated A sites was filtered by a combination of interpulse duration (IPD) ratio >3.0, read  
85 count >10, and p-value <0.05 following a recently published guideline (Zhu et al., 2018).  
86 Overall, the numbers of methylated A-loci were consistent with the dynamics of the 6mA/A  
87 detected by UHPLC-QTRAP, being high at the 16-cell stage and low at the 64-cell stage  
88 (Figure S1D-E). However, over 90% of A-loci were found to be inconsistently methylated  
89 across SMRT-seq reads from any given developmental stage (16- and 64-cell embryos, and  
90 adults; Figure 1E, S1D & F), indicating heterogeneity in methylated A-loci across cells that  
91 are expected to be uniform, particularly at the 16-cell stage (Kraus et al., 2014). Only about  
92 7% of the loci were methylated in 100% of the reads (Supplemental File 1), and only 532 of  
93 the loci that were methylated in over 95% were shared between the 16- and 64-cell stages  
94 (Figure S1G). Finally, no motif representing the sequence context of all 6mA loci could be  
95 generated (Figure 1E & S2). The motif generated from the 88 loci that were methylated in over  
96 95% of the reads across all developmental stages examined was 5'-GACCG-3' (Figure S1G).  
97 This motif does not include an ApT context, suggesting that 6mA is not heritable in  
98 *Hydractinia* (Figure S1G and S2). Based on the above data, we conclude that 6mA marks are  
99 randomly distributed in the embryonic genome.

#### 100 ***Alkbh1* acts as a 6mA eraser in *Hydractinia* embryos**

101 ALKBH1 has been reported to function as a 6mA demethylation initiator enzyme in animals  
102 (Tian et al., 2020; Wu *et al.*, 2016). The *Hydractinia* genome encodes a single *Alkbh1* homolog  
103 (Figure S3) that we tested to deduce its potential role in 6mA clearance. For this, we designed  
104 a specific shRNA-targeting *Alkbh1* (*shAlkbh1*; Figure S4) and injected it into zygotes. Embryos  
105 injected with a shRNA-targeting *GFP* (*shGFP*) were used as a negative control (Figure 2A &  
106 S4). Confocal imaging of anti-6mA immunofluorescence in 64-cell embryos showed that, in  
107 *shAlkbh1* injected embryos, 6mA signals were higher when compared with those from *shGFP*-

108 injected ones (Figure 2A). Co-injection of *shAlkbh1* and *Alkbh1* mRNA carrying four silent  
109 mutations (rendering it resistant to the *shAlkbh1*) partially rescued the 6mA signal (Figure 2A-  
110 B). To confirm these results, we electroporated *shAlkbh1* into zygotes, extracted genomic DNA  
111 at the 64-cell stage, and then analyzed the 6mA content by UHPLC-QTRAP mass spectrometry  
112 with [<sup>3</sup>D<sub>1</sub>]-6mA as internal standard. We found a significantly higher level of 6mA in *shAlkbh1*  
113 electroporated embryos as compared to *shGFP* electroporated ones at the 64-cell stage (Figure  
114 2C), consistent with what was observed in the above-described IF studies. These results  
115 confirm that *Alkbh1* acts in erasing 6mA from the genome of early *Hydractinia* embryos.  
116

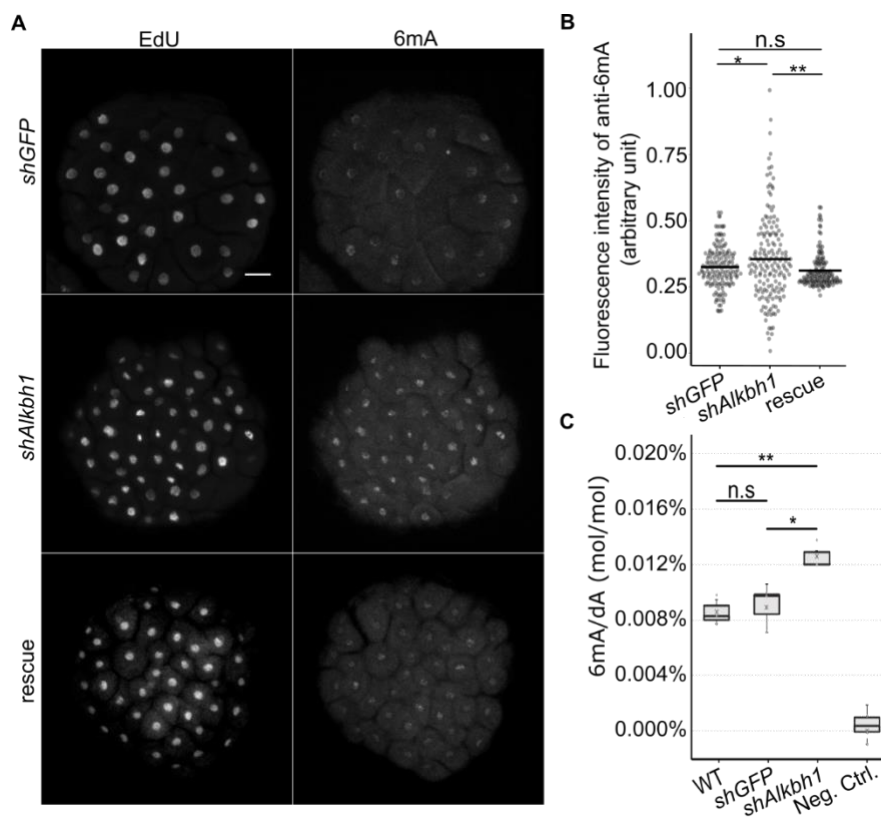

**Figure 2. *Alkbh1* removes genomic 6mA in *Hydractinia* embryos.** **A.** Whole-mount immunofluorescence of anti-6mA in 64-128-cell embryos upon injection of *shGFP* (as control), *shAlkbh1*, and rescue (see text). **B.** Relative quantification of anti-6mA signals from immunofluorescence images (in triplicate). **C.** UHPLC-QTRAP quantification of *shAlkbh1*-electroporated embryos showing significantly higher level of 6mA/dA ( $P < 0.05$ ) compared to *shGFP* electroporated embryos and to wild type embryos at 64-128 cell stage. n.s: not significantly different ( $P > 0.05$ ). \* significantly different with  $P$  value  $< 0.05$ , \*\* significantly different with  $P$  value  $< 0.01$ .

117 **Zygotic genome activation follows 6mA clearance**

118 In many animals, early embryos rely on maternal RNAs, activating their own genomes only at  
119 later developmental stages. Given the dynamic levels of 6mA in early embryos, we  
120 hypothesized that 6mA regulates the activation of the *Hydractinia* zygotic genome. To  
121 determine the stage at which zygotic transcription is activated, we used EU incorporation  
122 assays to visualize nascent RNA (Figure 3A) and established that a major transcriptional wave  
123 commences at the 64-cell stage, with little or no EU incorporation observed in earlier stages  
124 (Figure 3B-D). Therefore, it appears that a major wave of ZGA occurs immediately following  
125 the clearance of 6mA from the embryonic genome (Figure 1B-C & 3B).

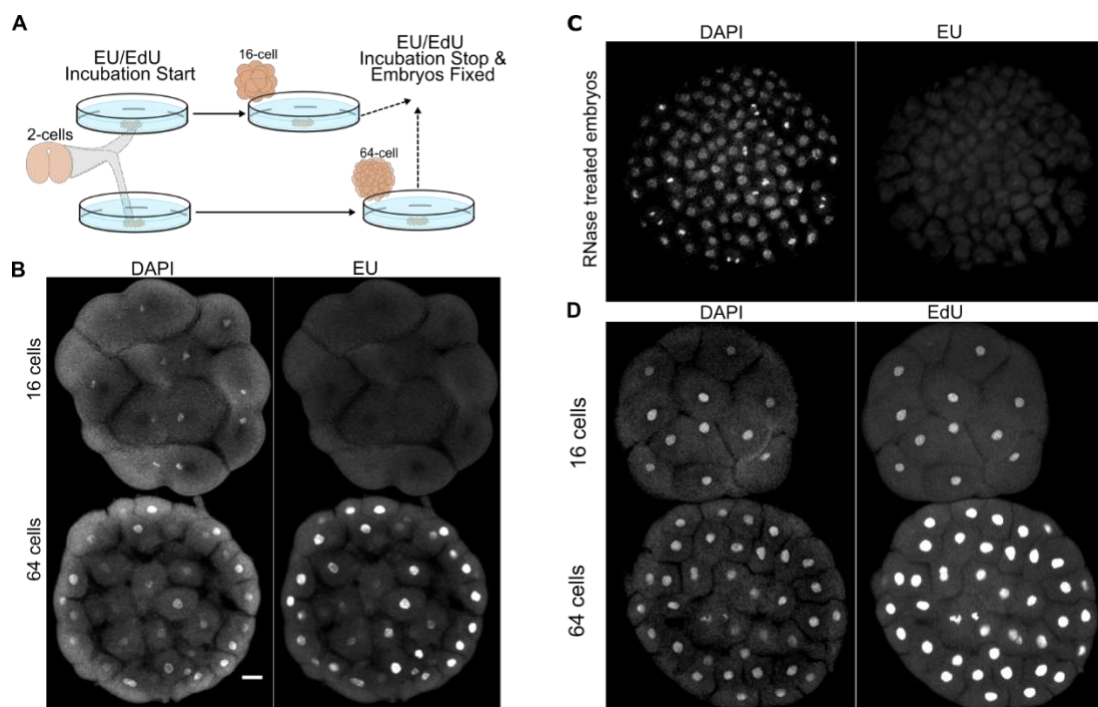

**Figure 3. Zygotic Genome Activation at the 64-cell stage of *Hydractinia* embryos.** **A.** EU/EdU incorporation experiment setup. **B.** High EU incorporation in 64-cell but undetectable in 16-cell embryos of *Hydractinia*. **C.** RNase treatment abolishes the EU signal. **D.** EdU is incorporated in 16- and 64-cell embryos. Scale bar: 20  $\mu$ m.

### 126 ***Alkbh1* knockdown delays zygotic genome activation**

127 The occurrence of a major wave of ZGA immediately following 6mA clearance at the 64-cell  
128 stage prompted us to explore a possible functional link between these two phenomena. To  
129 examine this potential link, we injected *shAlkbh1* into zygotes to target *Alkbh1* mRNA and  
130 impede 6mA clearance. We then assessed zygotic transcription at the 64-cell stage by EU  
131 incorporation. We found that lowering *Alkbh1* activity and the resulting elevated level of 6mA  
132 at the 64-cell stage (Figure 2) caused ZGA to be delayed by three cell cycles, commencing at  
133 the 512-cell stage instead of at the 64-cell stage as in untreated and *shGFP*-injected embryos

134 (Figure 4 & S5). The late ZGA suggests that 6mA interferes with transcription, consistent with  
135 a previous study showing that genomic 6mA causes transcriptional pausing by stalling RNA  
136 polymerase II (Wang et al., 2017). The late recommencement of zygotic transcription in  
137 *Alkbh1*-knockdown embryos could have been enabled by 6mA dilution after DNA replication,  
138 assuming that 6mA incorporation was limited to occurring primarily in single- to 16-cell  
139 embryos. Delayed ZGA in *Alkbh1*-knockdown embryos caused no visible long-term defects;  
140 the embryos developed normally to planula larvae and successfully metamorphosed to primary  
141 polyps (Figure S5B).

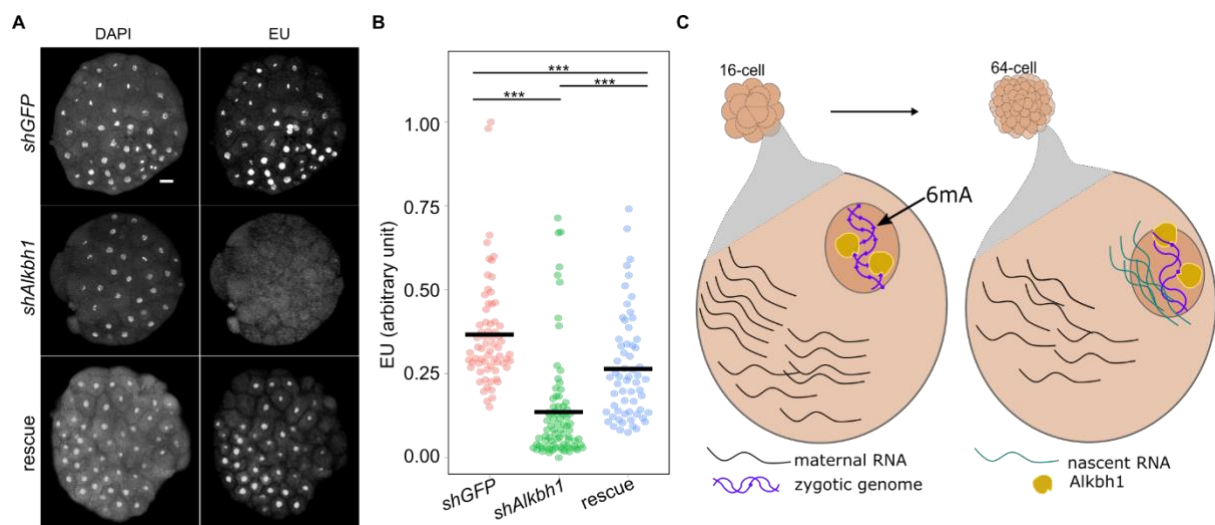

**Figure 4. Knockdown of *Alkbh1* delays zygotic genome activation in *Hydractinia*.** **A.** Whole-mount image of EU incorporation signals at 64 cells upon injection with *shGFP*, *shAlkbh1*, and rescue solution (see text). **B.** Relative quantification of EU signals (in triplicate). **C.** Model displaying the genomic 6mA removals by *Alkbh1* prior to zygotic genome activation.

## 142 The source of 6mA in the embryonic genome

143 To address how 6mA is incorporated into the *Hydractinia* genome between the 2- and 16-cell  
144 stages, we initially focused on *Mettl4* and *N6amt1*, homologs of both of which have been  
145 proposed to function as 6mA methyltransferases in other animals (Greer et al., 2015; Xiao et  
146 al., 2018). The *Hydractinia* genome encodes one copy of each of the genes (Figure S6). Of  
147 note, *Hydractinia* and other animals' N6AMT1 proteins contain no clear nuclear localization  
148 signal (Table S1). The likely inability of N6amt1 to act on nuclear DNA is inconsistent with a  
149 role as 6mA methyltransferases. If one of these genes (*N6amt1* or *Mettl4*) functioned as a 6mA  
150 methyltransferase, their downregulation would be expected to cause premature ZGA due to the  
151 absence of 6mA (Figure S7A). However, downregulation of both genes using shRNA did not



152 result in premature ZGA (Figure S7B). Consistent with our results, recent reports show that  
153 *Mettl4* and *N6amt1* do not deposit 6mA in mammalian cells (Liu et al., 2020; Xie *et al.*, 2018).

154

## 155 **DISCUSSION**

156 A possible alternative source for methylated adenosine is m6A-marked RNA. In animals,  
157 maternal transcripts are degraded prior to ZGA (Chen et al., 2019; Varnum and Wormington,  
158 1990), with m6A acting as a degradation mark (Ivanova et al., 2017; Zhao et al., 2017). We  
159 propose that methylated adenine from degraded maternal RNA is recycled through the salvage  
160 pathway and fuels methylated DNA synthesis during *Hydractinia* embryonic cleavage. Five  
161 observations are consistent with this hypothesis. First, we have performed HPLC-MS/MS  
162 experiments and find that m6A-marked RNAs are indeed degraded between the 2-cell and the  
163 16-cell stages in *Hydractinia* embryos (Figure 5A), providing high amounts of methylated  
164 adenosine. Second, continuous RNR inhibition by hydroxyurea, starting with zygotes, stalled  
165 replication at the 8-cell stage (Figure 5B), indicating the depletion of maternally provided  
166 dNTPs and the requirement for NTP-dNTP conversion prior to this stage. Third, the random  
167 distribution of 6mA in the genome (Figure 1E) suggests a non-selective incorporation of 6mA  
168 into replicating DNA. Fourth, the delayed ZGA upon *Alkbh1* knockdown (Figure 3B and S6A)  
169 and the lack of premature ZGA following *N6amt1/Mettl4* knockdown (Figure S7B) indicate a  
170 lack of methyltransferase that maintains 6mA through embryogenesis. Finally, labeling gravid  
171 females with EU, followed by spawning and fertilization, resulted in embryos that had the  
172 signal in their nuclei (Figure S8). This is consistent with studies done in mammalian cells,  
173 showing that m6A ribonucleotides can be converted to 6mA deoxynucleotides and  
174 incorporated into the genome through a metabolic pathway that is conserved in animals  
175 (Musheev et al., 2020).

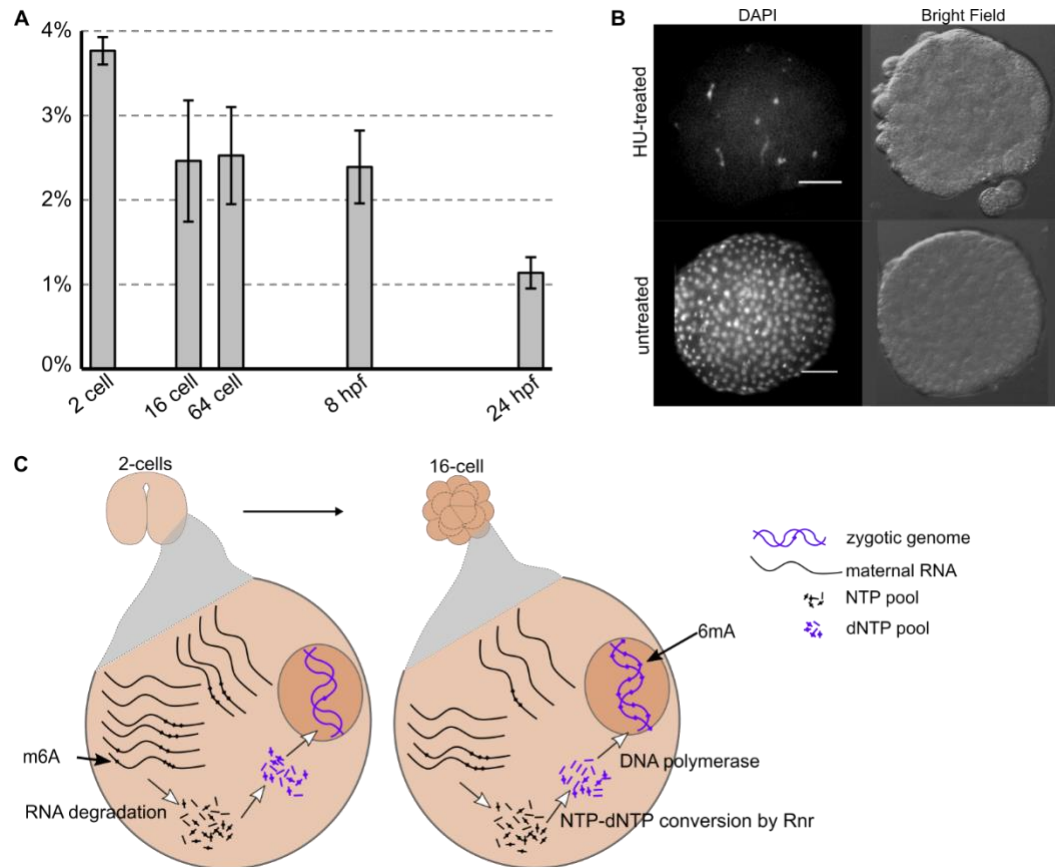

**Figure 5. The maternal RNA recycling hypothesis and the evidence supporting it. A.** Rapid decline of m6A-marked maternal RNA occurs between the 2- to 16-cell stages, analyzed by UHPLC-QQQ of m6A/A (mol/mol) from five *Hydractinia* developmental stages. **B.** Replication stall at 8-16 nuclei following hydroxyurea treatment. The control shows a normal number of nuclei. **C.** Model of stepwise m6A to 6mA conversion, followed by genomic incorporation of 6mA during early embryogenesis of *Hydractinia*.

176 An inverse correlation between zygotic transcription and 6mA during early embryogenesis can  
 177 be inferred from studies using zebrafish and *Drosophila* (reviewed in ref (Bochtler and  
 178 Fernandes, 2020)). Therefore, the model we propose for *Hydractinia* (Figure 5c) may be a  
 179 general characteristic of all animals. Taken together, we conclude that 6mA is randomly and  
 180 passively accumulated within the *Hydractinia* genome. This leads to the inhibition of  
 181 transcription, particularly in early embryos, but is not epigenetic in nature. Alkbh1 is essentially  
 182 a ‘cleaner’, keeping the genome 6mA-free and transcriptionally active.

183

184 **Acknowledgments**

185 We thank our laboratory members for support and discussions, the NIH Intramural Sequencing  
186 Center (NISC) for generating the sequence data, and Jonathan J. Henry (University of Illinois  
187 at Urbana-Champaign) for advice on electroporation. Markus Müller (University of Munich)  
188 is kindly acknowledged for providing D3-6mA and for comments. Confocal images were taken  
189 at the Centre for Microscopy and Imaging Core Facility at NUI Galway. HPLC-MS/MS data  
190 were obtained at the Mass Spectrometry Facility at NUI Galway. We would like to thank Paul  
191 Gonzalez at the National Human Genome Research Institute (NHGRI) of the National  
192 Institutes of Health (NIH) for his thoughtful insights and advice regarding computational  
193 approaches for data analyses. We also thank Anh-Dao Nguyen at NHGRI/NIH for her efforts  
194 in making the data generated in the course of this study publicly available through the  
195 Hydractinia Genome Project Portal (<https://research.nhgri.nih.gov/hydractinia>).

196

197 Funding: UF is a Wellcome Trust Investigator in Science (grant no. 210722/Z/18/Z, co-funded  
198 by the SFI-HRB-Wellcome Biomedical Research Partnership). This work was also funded by  
199 a Science Foundation Ireland Investigator Award to UF (grant no. 11/PI/1020), by the NSF  
200 EDGE program (grant no. 1923259 to CES and UF), and by the Intramural Research Program  
201 of the National Human Genome Research Institute, National Institutes of Health to ADB (ZIA  
202 HG000140). SGG was a Marie Curie Incoming International Fellow (project 623748) and was  
203 also supported by a Science Foundation Ireland SIRG award (grant no. 13/SIRG/2125). MSS  
204 is a Human Frontier Science Program Long-Term Postdoctoral Fellow (grant no.  
205 LT000756/2020-L). F was a Hardiman Scholar and also supported by a Thomas Crawford  
206 Hayes Research Grant.

207

#### 208 **Author contributions:**

209 F, SGG, and UF initiated and conceptualized the project. F performed all laboratory  
210 experiments and analyzed data. MSS established electroporation. SNB, CES, SGG, ADB, and  
211 F performed the computational analyses. F and UF wrote the manuscript.

212

213 **Data availability:** The data generated in the course of this study are publicly available through  
214 the *Hydractinia* Genome Project Portal (<https://research.nhgri.nih.gov/hydractinia>).  
215 Corresponding data is archived in the NCBI Sequence Read Archive (SRA) under BioProject  
216 PRJNA807936.

217

218 **References**

219

- 220 Abakir, A., Giles, T.C., Cristini, A., Foster, J.M., Dai, N., Starczak, M., Rubio-Roldan, A., Li,  
221 M., Eleftheriou, M., Crutchley, J., et al. (2020). N(6)-methyladenosine regulates the stability  
222 of RNA:DNA hybrids in human cells. *Nat Genet.* 10.1038/s41588-019-0549-x.
- 223 Beh, L.Y., Debelouchina, G.T., Clay, D.M., Thompson, R.E., Lindblad, K.A., Hutton, E.R.,  
224 Bracht, J.R., Sebra, R.P., Muir, T.W., and Landweber, L.F. (2019). Identification of a DNA  
225 N6-Adenine Methyltransferase Complex and Its Impact on Chromatin Organization. *Cell*  
226 *177*, 1781-1796 e1725. 10.1016/j.cell.2019.04.028.
- 227 Bochtler, M., and Fernandes, H. (2020). DNA adenine methylation in eukaryotes: Enzymatic  
228 mark or a form of DNA damage? *Bioessays*, e2000243. 10.1002/bies.202000243.
- 229 Chen, H., Einstein, L.C., Little, S.C., and Good, M.C. (2019). Spatiotemporal Patterning of  
230 Zygotic Genome Activation in a Model Vertebrate Embryo. *Dev Cell* *49*, 852-866 e857.  
231 10.1016/j.devcel.2019.05.036.
- 232 Douvlataniotis, K., Bensberg, M., Lentini, A., Gylemo, B., and Nestor, C.E. (2020). No  
233 evidence for DNA N6-methyladenine in mammals. *Science advances* *6*, eaay3335.
- 234 Geier, G.E., and Modrich, P. (1979). Recognition sequence of the dam methylase of  
235 *Escherichia coli* K12 and mode of cleavage of Dpn I endonuclease. *J Biol Chem* *254*, 1408-  
236 1413.
- 237 Greer, Eric L., Blanco, Mario A., Gu, L., Sendinc, E., Liu, J., Aristizábal-Corrales, D., Hsu,  
238 C.-H., Aravind, L., He, C., and Shi, Y. (2015). DNA Methylation on N<sup>6</sup>-  
239 Adenine in *C. elegans*. *Cell* *161*, 868-878. 10.1016/j.cell.2015.04.005.
- 240 Haagmans, W., and van Der Woude, M. (2000). Phase variation of Ag43 in *Escherichia coli*:  
241 Dam-dependent methylation abrogates OxyR binding and OxyR-mediated repression of  
242 transcription. *Molecular microbiology* *35*, 877-887.
- 243 He, S., Zhang, G., Wang, J., Gao, Y., Sun, R., Cao, Z., Chen, Z., Zheng, X., Yuan, J., Luo, Y.,  
244 et al. (2019). 6mA-DNA-binding factor Jumu controls maternal-to-zygotic transition  
245 upstream of *Zelda*. *Nat Commun* *10*, 2219. 10.1038/s41467-019-10202-3.
- 246 Ivanova, I., Much, C., Di Giacomo, M., Azzi, C., Morgan, M., Moreira, P.N., Monahan, J.,  
247 Carrieri, C., Enright, A.J., and O'Carroll, D. (2017). The RNA m6A Reader YTHDF2 Is  
248 Essential for the Post-transcriptional Regulation of the Maternal Transcriptome and Oocyte  
249 Competence. *Molecular Cell* *67*, 1059-1067.e1054.  
250 <https://doi.org/10.1016/j.molcel.2017.08.003>.
- 251 Kong, Y., Cao, L., Deikus, G., Fan, Y., Mead, E.A., Lai, W., Zhang, Y., Yong, R., Sebra, R.,  
252 Wang, H., et al. (2022). Critical assessment of DNA adenine methylation in eukaryotes  
253 using quantitative deconvolution. *Science* *375*, 515-522. doi:10.1126/science.abe7489.
- 254 Koziol, M.J., Bradshaw, C.R., Allen, G.E., Costa, A.S.H., Frezza, C., and Gurdon, J.B. (2016).  
255 Identification of methylated deoxyadenosines in vertebrates reveals diversity in DNA  
256 modifications. *Nat Struct Mol Biol* *23*, 24-30. 10.1038/nsmb.3145.
- 257 Kraus, Y., Flici, H., Hensel, K., Plickert, G., Leitz, T., and Frank, U. (2014). The embryonic  
258 development of the cnidarian *Hydractinia echinata*. *Evol Dev* *16*, 323-338.  
259 10.1111/ede.12100.
- 260 Lahue, R.S., Su, S.-S., and Modrich, P. (1987). Requirement for d (GATC) sequences in  
261 *Escherichia coli* mutHLS mismatch correction. *Proceedings of the National Academy of*  
262 *Sciences* *84*, 1482-1486.
- 263 Liu, J., Zhu, Y., Luo, G.Z., Wang, X., Yue, Y., Wang, X., Zong, X., Chen, K., Yin, H., Fu, Y.,  
264 et al. (2016). Abundant DNA 6mA methylation during early embryogenesis of zebrafish  
265 and pig. *Nat Commun* *7*, 13052. 10.1038/ncomms13052.

- 266 Liu, X., Lai, W., Li, Y., Chen, S., Liu, B., Zhang, N., Mo, J., Lyu, C., Zheng, J., Du, Y.R., et  
267 al. (2020). N(6)-methyladenine is incorporated into mammalian genome by DNA  
268 polymerase. *Cell Res*. 10.1038/s41422-020-0317-6.
- 269 Musheev, M.U., Baumgartner, A., Krebs, L., and Niehrs, C. (2020). The origin of genomic  
270 N(6)-methyl-deoxyadenosine in mammalian cells. *Nat Chem Biol*. 10.1038/s41589-020-  
271 0504-2.
- 272 O'Brown, Z.K., Boulias, K., Wang, J., Wang, S.Y., O'Brown, N.M., Hao, Z., Shibuya, H., Fady,  
273 P.E., Shi, Y., He, C., et al. (2019). Sources of artifact in measurements of 6mA and 4mC  
274 abundance in eukaryotic genomic DNA. *BMC genomics* 20, 445. 10.1186/s12864-019-  
275 5754-6.
- 276 Schiffers, S., Ebert, C., Rahimoff, R., Kosmatchev, O., Steinbacher, J., Bohne, A.V., Spada,  
277 F., Michalakakis, S., Nickelsen, J., Müller, M., and Carell, T. (2017). Quantitative LC-MS  
278 provides no evidence for m6-dA or m4-dC in the genome of mouse embryonic stem cells  
279 and tissues. *Angewandte Chemie International Edition* 56, 11268-11271.
- 280 Slater, S., Wold, S., Lu, M., Boye, E., Skarstad, K., and Kleckner, N. (1995). E. coli SeqA  
281 protein binds oriC in two different methyl-modulated reactions appropriate to its roles in  
282 DNA replication initiation and origin sequestration. *Cell* 82, 927-936.
- 283 Tian, L.F., Liu, Y.P., Chen, L., Tang, Q., Wu, W., Sun, W., Chen, Z., and Yan, X.X. (2020).  
284 Structural basis of nucleic acid recognition and 6mA demethylation by human ALKBH1.  
285 *Cell Res* 30, 272-275. 10.1038/s41422-019-0233-9.
- 286 Varnum, S.M., and Wormington, W.M. (1990). Deadenylation of maternal mRNAs during  
287 *Xenopus* oocyte maturation does not require specific cis-sequences: a default mechanism  
288 for translational control. *Genes & Development* 4, 2278-2286. 10.1101/gad.4.12b.2278.
- 289 Wang, W., Xu, L., Hu, L., Chong, J., He, C., and Wang, D. (2017). Epigenetic DNA  
290 Modification N(6)-Methyladenine Causes Site-Specific RNA Polymerase II Transcriptional  
291 Pausing. *J Am Chem Soc* 139, 14436-14442. 10.1021/jacs.7b06381.
- 292 Wang, Y., Sheng, Y., Liu, Y., Zhang, W., Cheng, T., Duan, L., Pan, B., Qiao, Y., Liu, Y., and  
293 Gao, S. (2019). A distinct class of eukaryotic MT-A70 methyltransferases maintain  
294 symmetric DNA N6-adenine methylation at the ApT dinucleotides as an epigenetic mark  
295 associated with transcription. *Nucleic acids research* 47, 11771-11789.
- 296 Wu, T.P., Wang, T., Seetin, M.G., Lai, Y., Zhu, S., Lin, K., Liu, Y., Byrum, S.D., Mackintosh,  
297 S.G., Zhong, M., et al. (2016). DNA methylation on N(6)-adenine in mammalian embryonic  
298 stem cells. *Nature* 532, 329-333. 10.1038/nature17640.
- 299 Xiao, C.L., Zhu, S., He, M., Chen, Zhang, Q., Chen, Y., Yu, G., Liu, J., Xie, S.Q., Luo, F., et  
300 al. (2018). N(6)-Methyladenine DNA Modification in the Human Genome. *Mol Cell* 71,  
301 306-318 e307. 10.1016/j.molcel.2018.06.015.
- 302 Xie, Q., Wu, T.P., Gimple, R.C., Li, Z., Prager, B.C., Wu, Q., Yu, Y., Wang, P., Wang, Y.,  
303 Gorkin, D.U., et al. (2018). N(6)-methyladenine DNA Modification in Glioblastoma. *Cell*.  
304 10.1016/j.cell.2018.10.006.
- 305 Yao, B., Li, Y., Wang, Z., Chen, L., Poidevin, M., Zhang, C., Lin, L., Wang, F., Bao, H., Jiao,  
306 B., et al. (2018). Active N6-Methyladenine Demethylation by DMAD Regulates Gene  
307 Expression by Coordinating with Polycomb Protein in Neurons. *Molecular Cell* 71, 848-  
308 857.e846. <https://doi.org/10.1016/j.molcel.2018.07.005>.
- 309 Zhang, G., Huang, H., Liu, D., Cheng, Y., Liu, X., Zhang, W., Yin, R., Zhang, D., Zhang, P.,  
310 Liu, J., et al. (2015). N6-methyladenine DNA modification in *Drosophila*. *Cell* 161, 893-  
311 906. 10.1016/j.cell.2015.04.018.
- 312 Zhao, B.S., Wang, X., Beadell, A.V., Lu, Z., Shi, H., Kuuspalu, A., Ho, R.K., and He, C.  
313 (2017). m6A-dependent maternal mRNA clearance facilitates zebrafish maternal-to-zygotic  
314 transition. *Nature* 542, 475-478. 10.1038/nature21355

315 <http://www.nature.com/nature/journal/v542/n7642/abs/nature21355.html#supplementary->  
316 [information.](#)

317 Zhu, S., Beaulaurier, J., Deikus, G., Wu, T.P., Strahl, M., Hao, Z., Luo, G., Gregory, J.A.,  
318 Chess, A., He, C., et al. (2018). Mapping and characterizing N6-methyladenine in  
319 eukaryotic genomes using single-molecule real-time sequencing. *Genome Research*.  
320 10.1101/gr.231068.117.

321

322

323

324

325

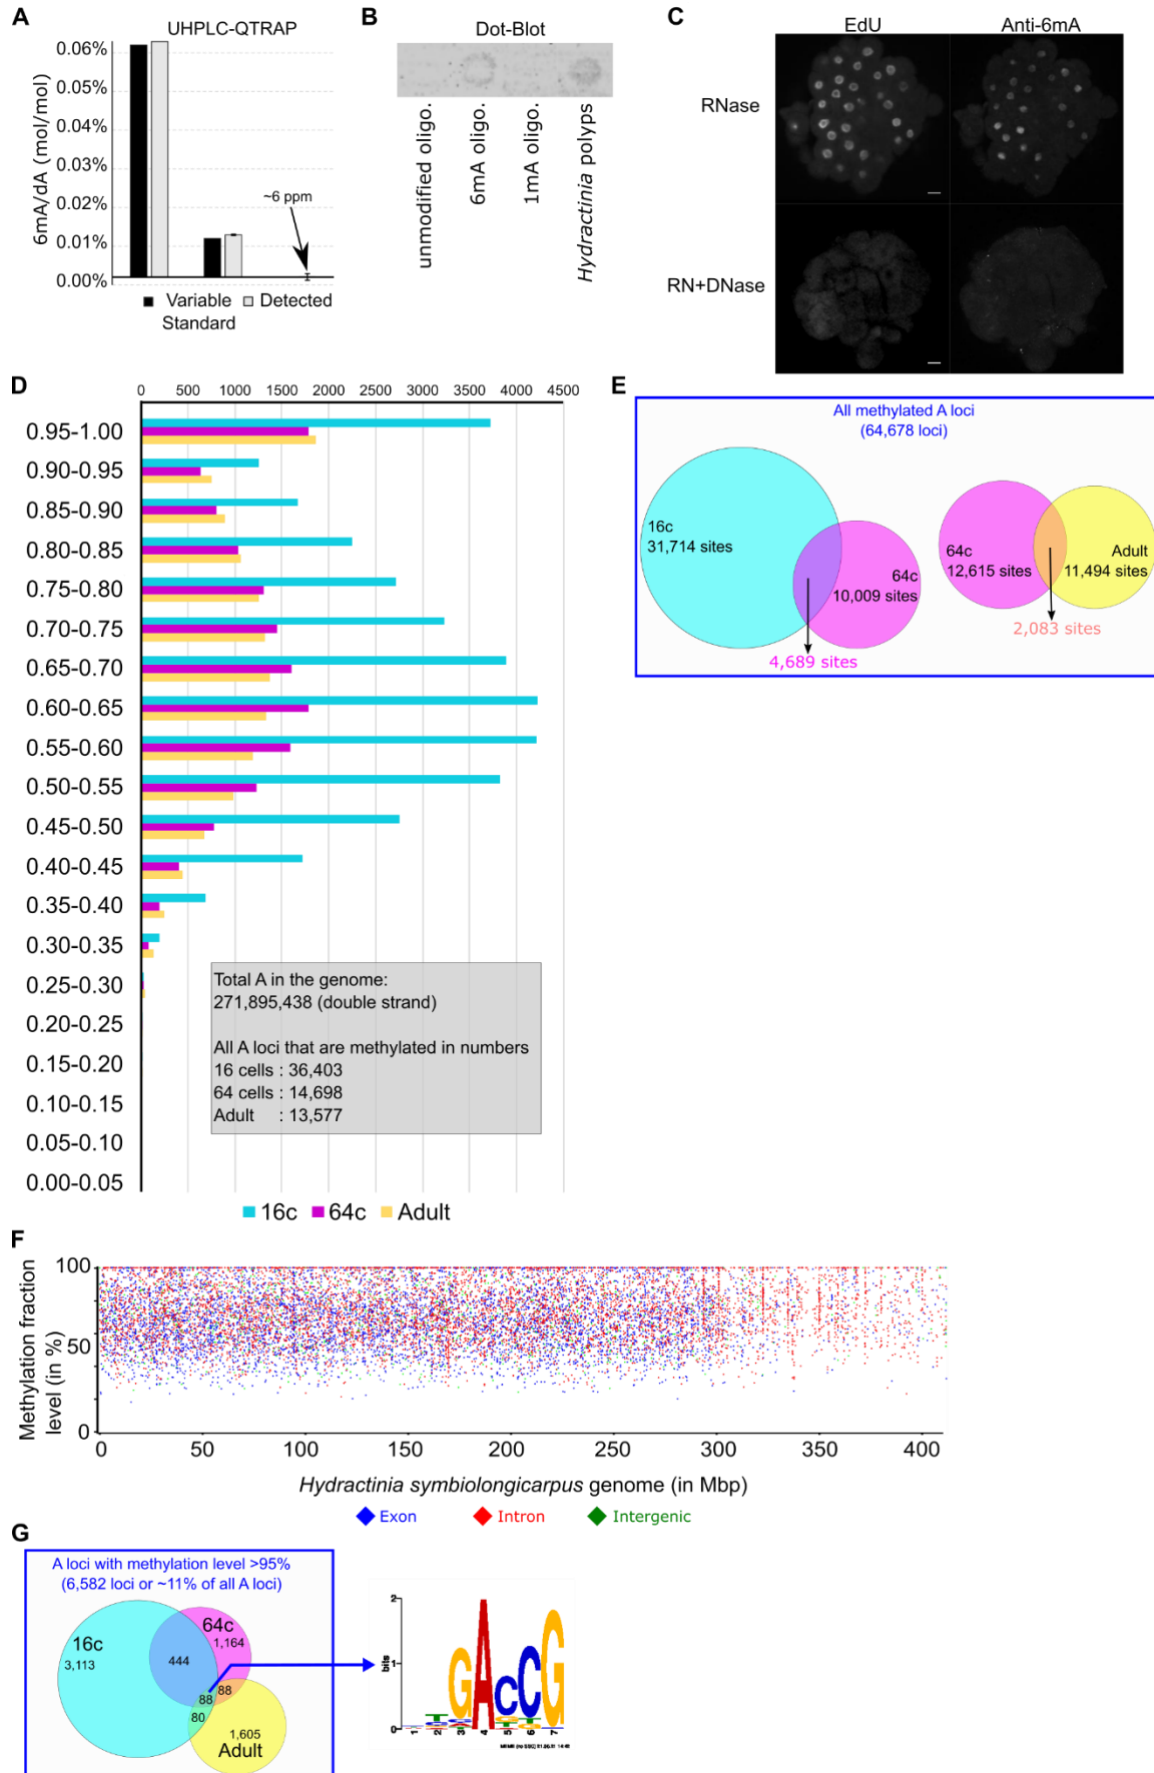

**Figure S1. Detection and distribution of 6mA in the genome of *Hydractinia symbiolongicarpus*.**

**A.** Detection of 6mA in reference solutions (0%, 0.01%, 0.06%) by UHPLC-QTRAP. **B.** Anti-6mA specificity assay by dot-blot. Each spot contains 200 ng DNA. 6mA/1mA oligos were prepared at 0.1% of modified-A/dA. **C.** DNase but not RNase treatment can abolish the signal of anti-6mA immunofluorescence. Scale bars: 20  $\mu$ m. **D.** Methylation level distribution on 16c, 64c, and adult genomes of *Hydractinia*. **E.** Venn diagram displaying the overlapping methylated A sites between 16c and 64c and between 64c and adult genomes. **F.** Distribution of A sites that were detected to be methylated in the genomes of adult specimens, plotted against the percentage of SMRT-seq reads that showed methylation at each site. **G.** Venn Diagram displaying the overlapping A sites between three genome that are always methylated and the consensus sequence generated by MEME-Chip of the 88 overlapping methylated A loci.



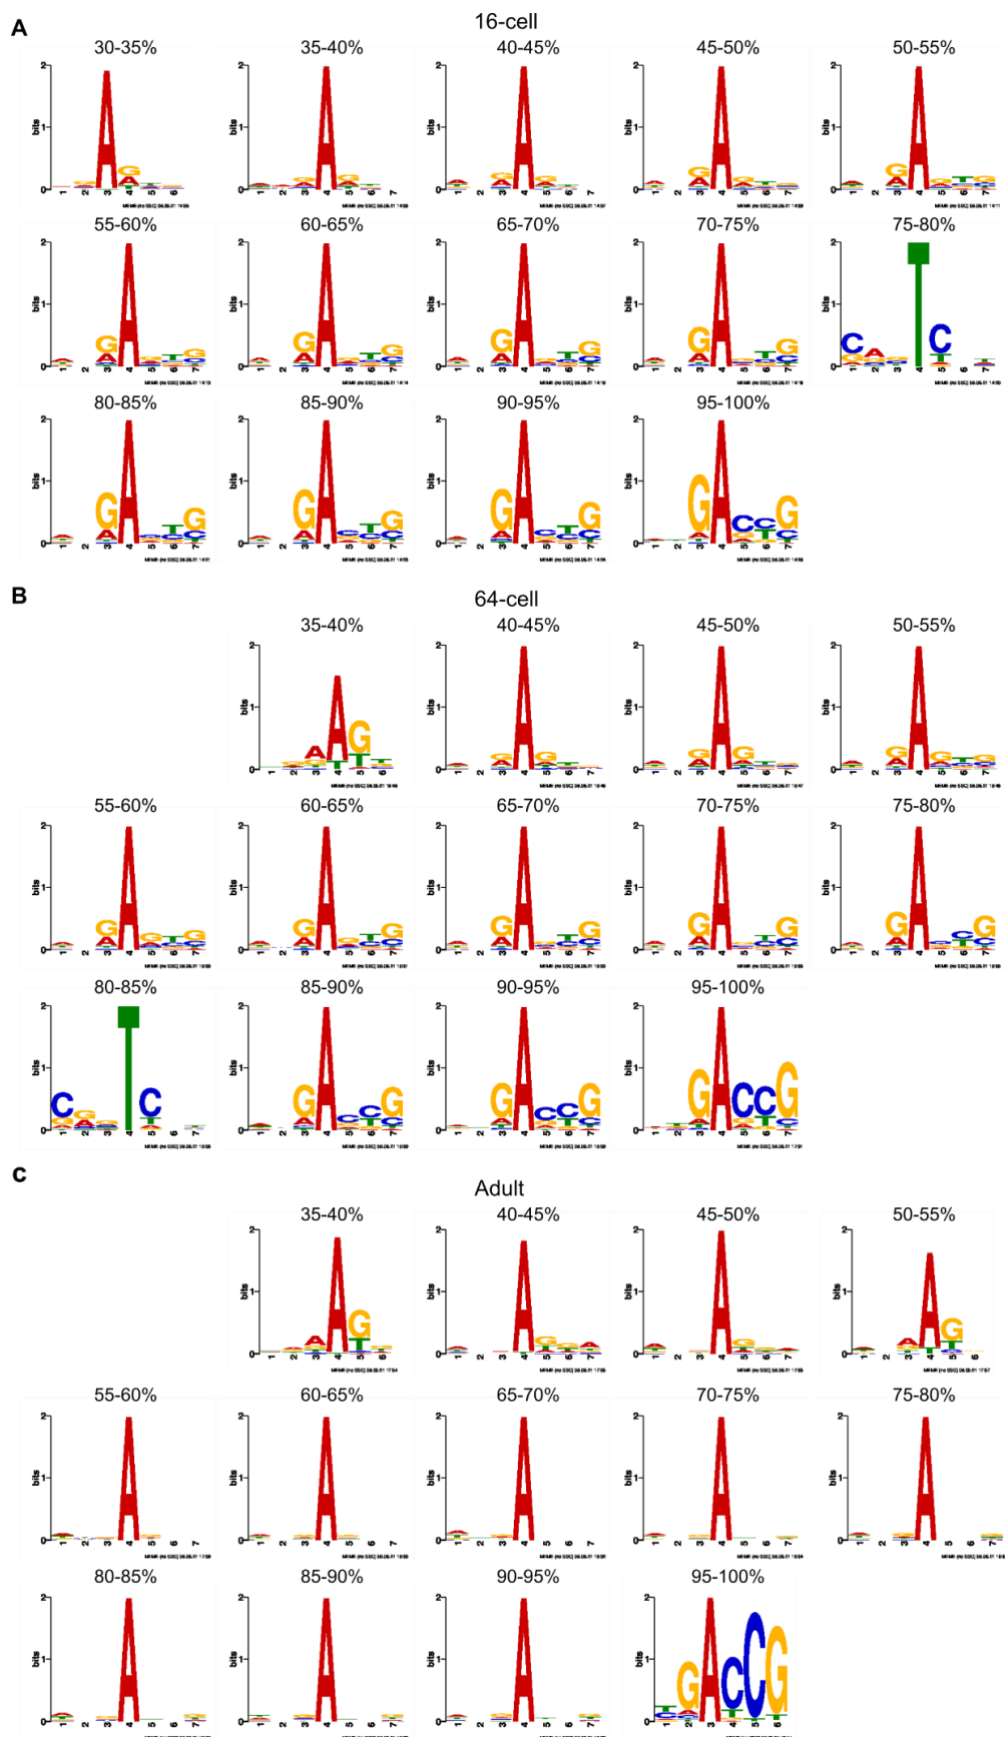

**Figure S2. The consensus sequence generated by MEME-Chip of the methylated A loci in their respective methylation fraction. A. 16-cell. B. 64-cell. C. Adult.**

327

328

329

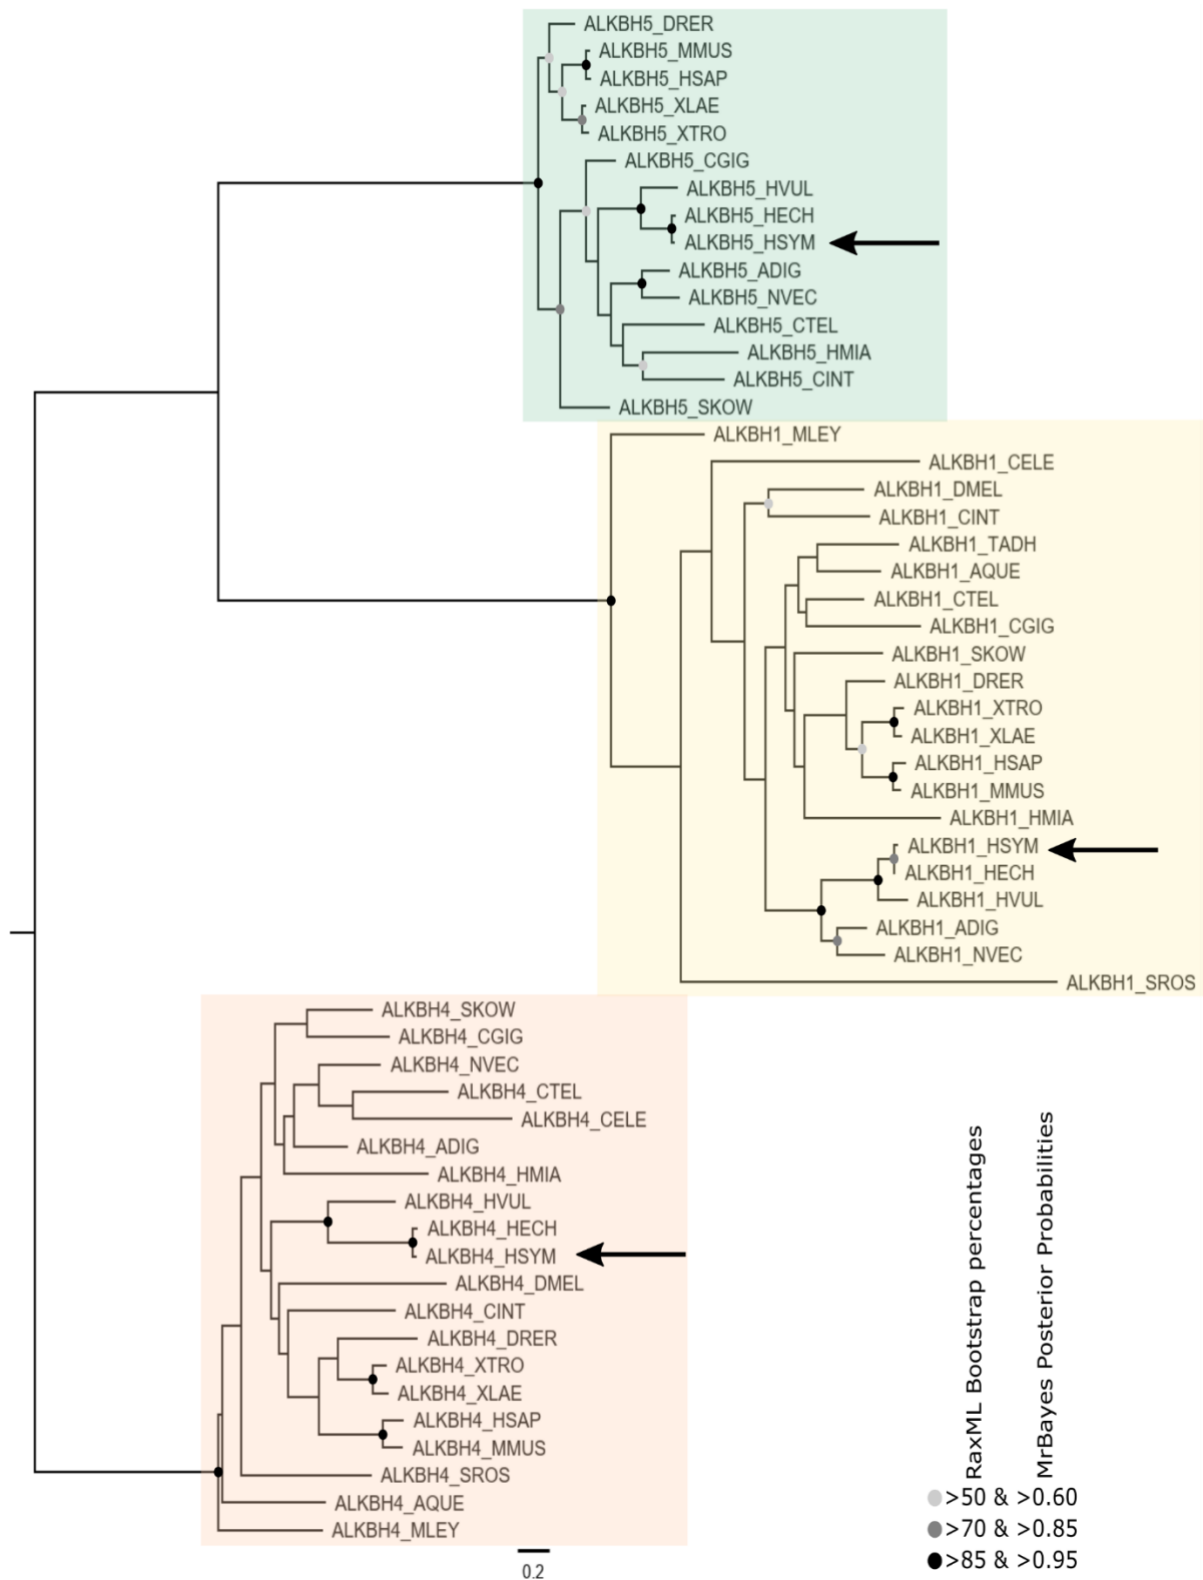

**Figure S3 Phylogenetic analysis of Alkbh proteins.** Maximum likelihood phylogenetic tree. Nodes supported by maximum likelihood bootstrap percentage and Bayesian inference posterior probability values are marked with greyscale circles as annotated. Alkbh homologs of *Hydractinia* are pointed by

arrows. The abbreviation of the species are described in Table S2. The raw alignment data and fasta file of all the sequence used in this phylogeny are provided in Supplemental File 2.

330

331

332

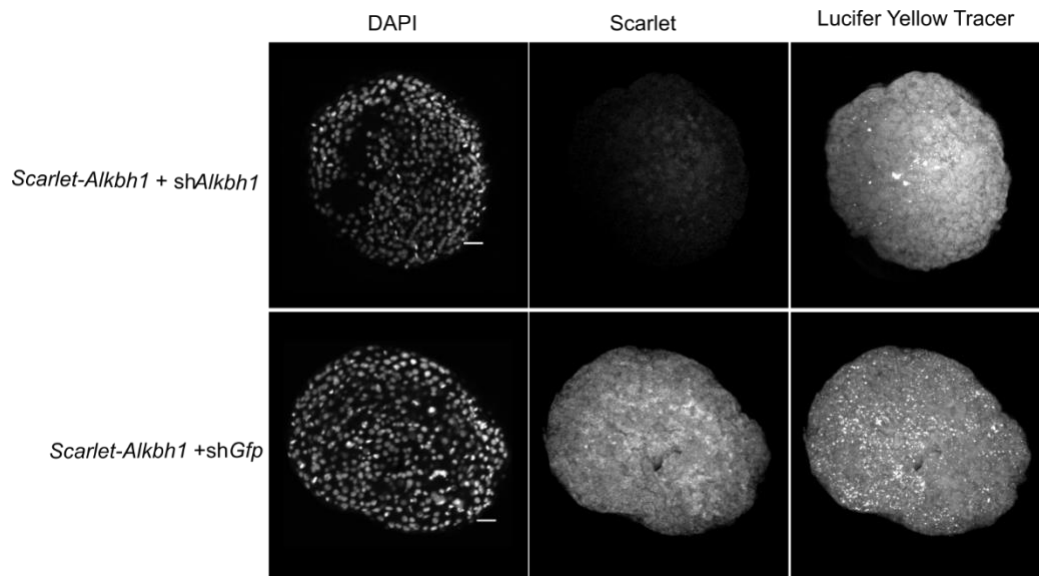

**Figure S4.** Synthetic mRNA encoding mScarlet fluorescence protein followed by the target sequence of *Hydractinia* *shAlkbh1* were co-injected (1  $\mu\text{g}/\mu\text{l}$ ) with *shAlkbh1* and *shGFP* (each 500  $\text{ng}/\mu\text{l}$ ). Strong signals of mScarlett in *shGFP* co-injection but not on *shAlkbh1* is indicative of successful knockdown effect by *shAlkbh1* at 15 hpf embryos. Scale bars: 20  $\mu\text{m}$ .

333

334

335

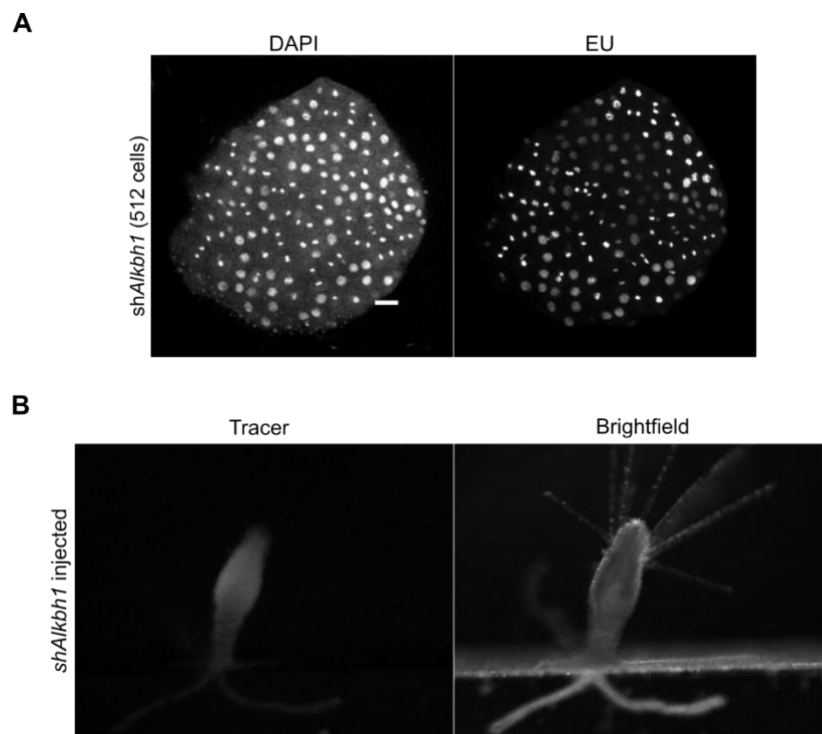

**Figure S5. Knockdown of Alkbh1 delays ZGA but is not lethal.** **A.** *Alkbh1* knockdown does not inhibit EU incorporation in 512-cell embryos. **B.** *shAlkbh1* injected embryo develops into a normal polyp. Scale bars: 20  $\mu$ m.

336

337

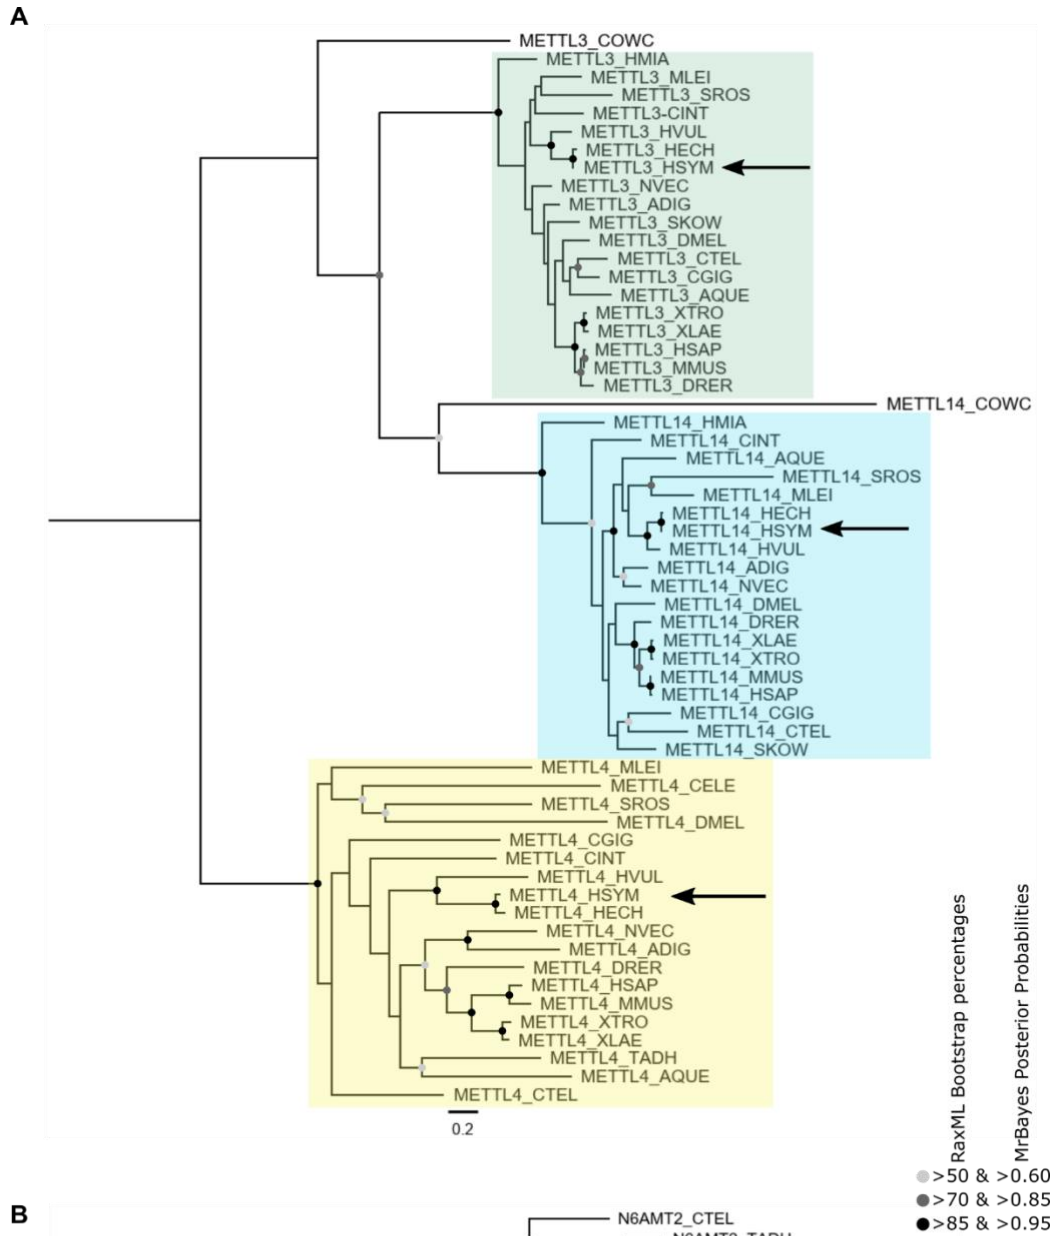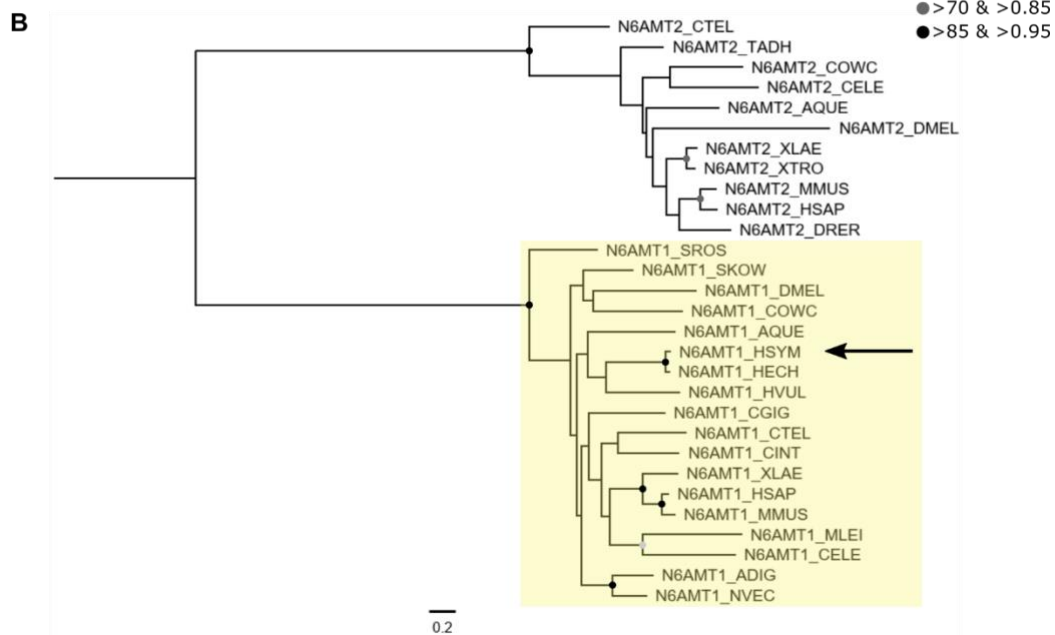

**Figure S6.** Phylogenetic analysis of Mettl and N6amt proteins. The trees represent a maximum likelihood phylogenety. The nodes with strong supports from maximum likelihood bootstrap percentages and Bayesian inference posterior probability are marked with a greyscale circle as annotated. Mettl4 and N6amt1 homologs of *Hydractinia* are pointed with arrows. The abbreviation of the species are described in Table S2. The raw alignment data and fasta file of all the sequence used in this phylogeny provided in Supplemental File 2.

338

339



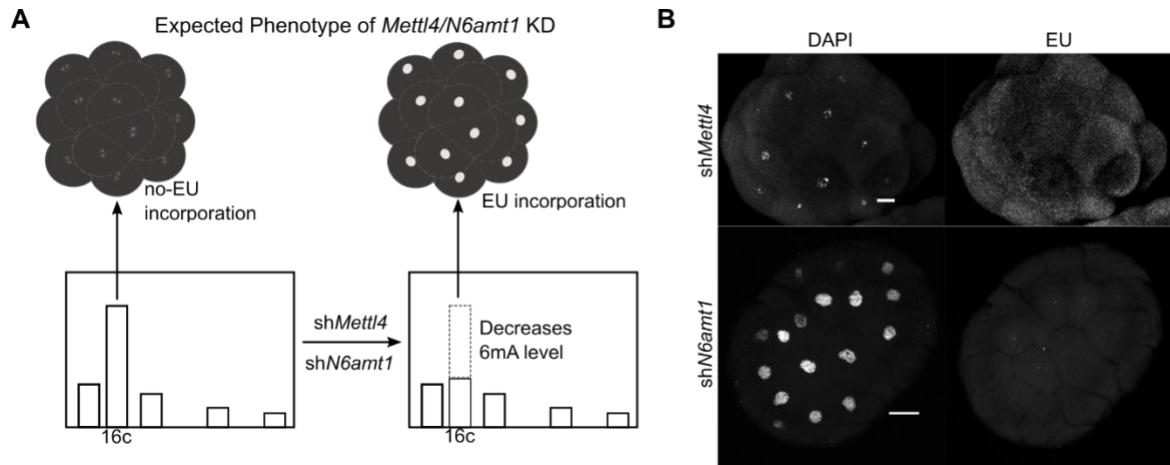

**Figure S7. Knockdown of 6mA methyltransferase candidate do not display premature ZGA.**

**A.** Experiment setup. Knockdown of *Mettl4/N6amt1* would be expected to result in premature ZGA if these enzymes were acting as 6mA methyltransferases. **B.** *Mettl4* and *N6amt1* knockdown does result in premature ZGA, suggesting that they do not act as 6mA methyltransferases. Scale bars: 20  $\mu\text{m}$ .

340

341

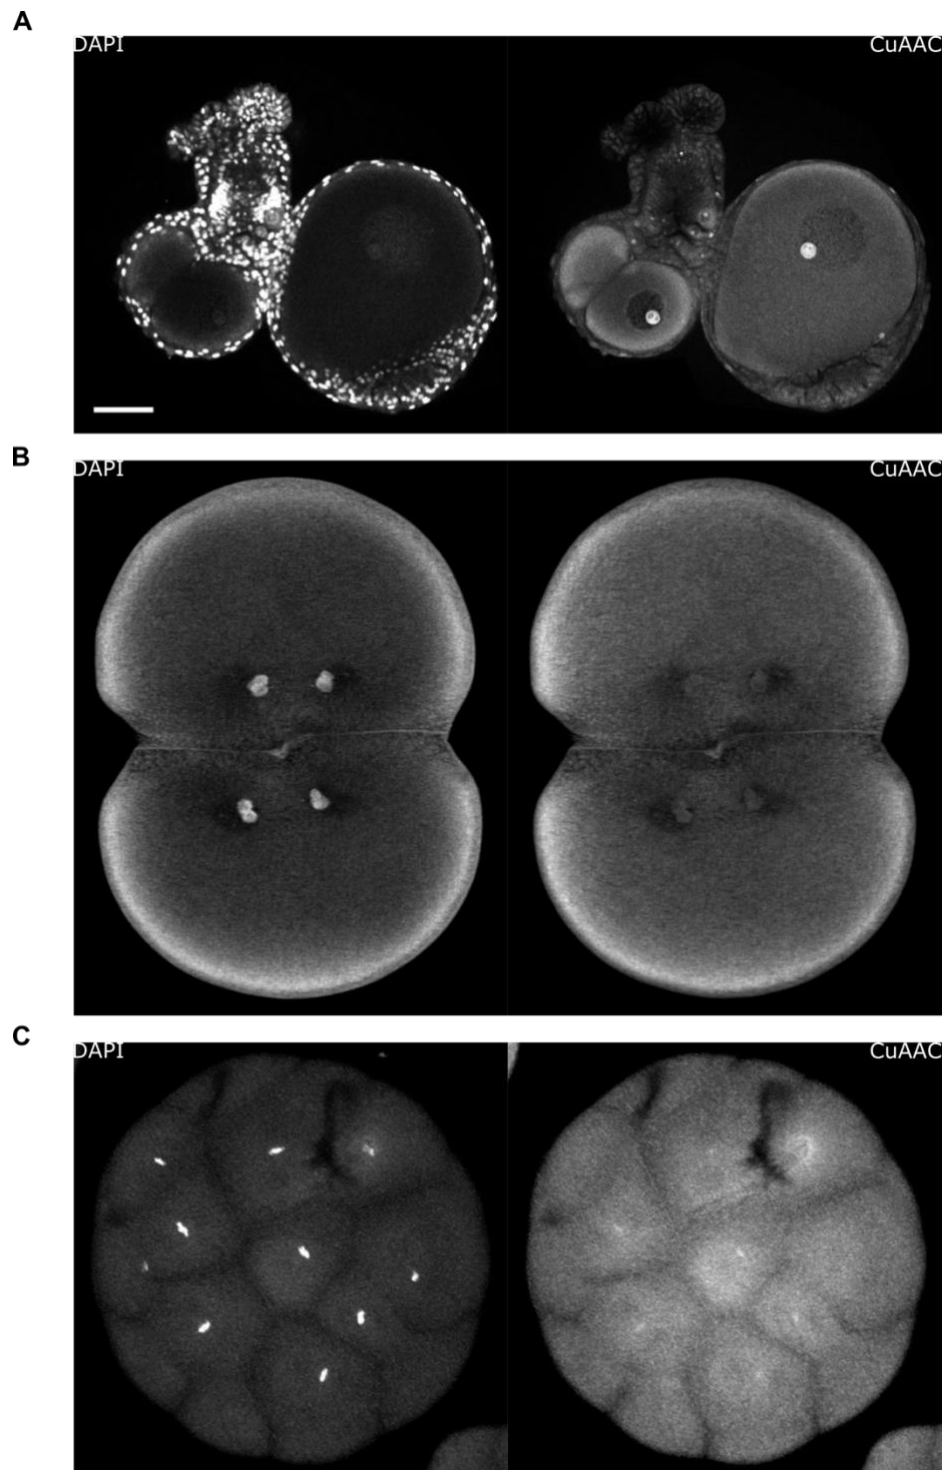

**Figure S8. Transfer of nucleotides from maternal RNA to zygotic DNA.** **A.** EU incorporation into nascent maternal RNA by a gravid female shown by CuAAC-Alexa 488 reaction in the cytosol and nucleolus of oocytes. **B.** Cytosolic maternal RNA at 2/4-cell stage embryo. **C.** CuAAC-Alexa 488 reaction stains the zygotic DNA in a 16-cell stage embryo. Scale bar in A: 50  $\mu$ m.

342

343

344

345

346 **Table S1 Nuclear localization signal prediction of methylation associated enzymes in**  
 347 ***Hydractinia***

| <i>Enzyme</i>      | <i>cNLS Score</i> | <i>NLSdb ConfNuc</i> | <i>1<sup>st</sup>/2<sup>nd</sup> PSORT</i> | <i>1<sup>st</sup> PSORT Score</i> | <i>2<sup>nd</sup> PSORT Score</i> |
|--------------------|-------------------|----------------------|--------------------------------------------|-----------------------------------|-----------------------------------|
| <i>DNMT3A_HSAP</i> | 18.5              | 6                    | Cytop/Nucl                                 | 16                                | 10                                |
| <i>Dnmt3_HSYM</i>  | 7.5               | 3                    | Nucl/Cytop-Nuc                             | 16.5                              | 15.5                              |
| <i>METTL4_HSAP</i> | 10.5              | 9                    | Nucl/Cytop-Nuc                             | 20.5                              | 15.5                              |
| <i>Mettl4_HSYM</i> | 7.3               | 14                   | Nucl/Cytop-Nuc                             | 19                                | 16.5                              |
| <i>Mettl4-CELE</i> | 10                | 0                    | Nucl/Cytop-Nuc                             | 18                                | 14                                |
| <i>N6AMT1_HSAP</i> | 0                 | 0                    | Cytop/Cytop-Nuc                            | 17                                | 15.5                              |
| <i>N6amt1_HSYM</i> | 0                 | 0                    | Cytosk/Cytop                               | 15                                | 7                                 |
| <i>ALKBH1_HSAP</i> | 6                 | 0                    | Cytop-Nuc/Cytop                            | 11.5                              | 10.5                              |
| <i>Alkbh1_HSYM</i> | 8.5               | 0                    | Cytop/Cytop-Nuc                            | 23                                | 17                                |

The cNLS mapper score indicates the probability that a given protein sequence contains a NLS. 0 indicates no NLS detected. NLSdb ConfNuc indicates the number of protein sequence in the NLS database that match the enquiry. PSORT is the localization prediction made by Wolf-PSORT with 1<sup>st</sup>/2<sup>nd</sup> PSORT indicating the first and the second-best localization prediction, respectively. The 1<sup>st</sup> PSORT score indicates the number of proteins (with known localization) considered similar to the enquired protein within the 1<sup>st</sup> prediction. Cytop: Cytoplasmic, Nucl: Nuclear, Cytop-Nuc: Cytoplama-nuclear, Cytosk: cytoskeleton.

348

349

350

351

**Table S2.** List of species and their abbreviation used in phylogenetic trees

| <b>Represented Phyla</b> | <b>Species</b>                       | <b>Abbrev.</b> |
|--------------------------|--------------------------------------|----------------|
| Choanoflagellata         | <i>Salpingoeca rosetta</i>           | SROS           |
| Choanoflagellata         | <i>Capsaspora owczarzaki</i>         | COWC           |
| Placozoa                 | <i>Trichoplax adhaerens</i>          | TADH           |
| Porifera                 | <i>Amphimedon queenslandica</i>      | AQUE           |
| Cnidaria: Anthozoa       | <i>Nematostella vectensis</i>        | NVEC           |
| Cnidaria: Anthozoa       | <i>Acropora digitifera</i>           | ADIG           |
| Cnidaria: Hydrozoa       | <i>Hydra vulgaris</i>                | HVUL           |
| Cnidaria: Hydrozoa       | <i>Hydractinia echinata</i>          | HECH           |
| Cnidaria: Hydrozoa       | <i>Hydractinia symbiolongicarpus</i> | HSYM           |
| Ctenophora               | <i>Mnemiopsis leidyi</i>             | MLEI           |
| Xenacoelomorpha          | <i>Hofstenia miamia</i>              | HMIA           |
| Ecdysozoa: Arthropoda    | <i>Drosophila melanogaster</i>       | DMEL           |
| Ecdysozoa: Nematoda      | <i>Caenorhabditis elegans</i>        | CELE           |
| Lophotrochozoa           | <i>Capitella teleta</i>              | CTEL           |
| Lophotrochozoa           | <i>Crassostrea gigas</i>             | CGIG           |
| Hemichordata             | <i>Saccoglossus kowalevskii</i>      | SKOW           |
| Chordata: Tunicata       | <i>Ciona intestinalis</i>            | CINT           |
| Chordata: Teleostei      | <i>Danio rerio</i>                   | DRER           |
| Chordata: Amphibia       | <i>Xenopus laevis</i>                | XLAE           |
| Chordata: Amphibia       | <i>Xenopus tropicalis</i>            | XTRO           |
| Chordata: Mammalia       | <i>Mus musculus</i>                  | MMUS           |
| Chordata: Mammalia       | <i>Homo sapiens</i>                  | HSAP           |

352

353

354 **Supplemental File 1. The methylation fractionation data of 6mA from IPD-analysis of**  
355 **PacBio reads of 16-cell, 64-cell and adult genome of *Hydractinia symbiolongicarpus* 291-**  
356 **10.**

357  
358 **Supplemental File 2. The raw alignment data and fasta file of all the sequences used for**  
359 **molecular phylogeny of Alkbh, Mettl and N6amt.**

360

361

## 362 MATERIALS AND METHOD

363

### 364 Animal Husbandry and Embryos Collection

365 Clones of *Hydractinia*, male (291-10) and females (295-8, 295-6) strains, were grown as  
366 previously described (Frank et al., 2020). Zygotes were collected and immediately cleaned with  
367 sterile-filtered sea water. For manipulation and injection purposes, the zygotes were incubated  
368 in ice cold condition to delay cleavages.

### 369 DNA Extraction

370 DNA was extracted from *Hydractinia* embryos and adult specimens using Phenol-Chloroform  
371 and glycogen precipitation protocols. Following RNaseA (ThermoScientific #EN0531) and  
372 RNaseT1 (ThermoScientific #EN0541) treatment, the DNA was further purified using a  
373 standard column-based purification protocol. The purified DNA was then assessed by UV-Vis  
374 spectrophotometer, Qubit dsDNA-BR (ThermoScientific # Q32850) and Qubit RNA-HS assay  
375 (ThermoScientific # Q32852). Only DNA solutions with undetected level of RNA by Qubit  
376 RNA-HS assay were used.

### 377 UHPLC-QQQ and -QTRAP for Determination of 6mA Levels

378 A total of 2 µg of DNA was prepared for digestion. For UHPLC-QTRAP, one picomole of  
379 <sup>3</sup>D<sub>1</sub>-6mA was added to the solutions as internal standard. External standards were prepared  
380 from serial dilution of modified oligonucleotide (5'-<sup>6m</sup>ATCGATCG-<sup>3</sup>) solutions; variable  
381 standard solutions were prepared from the calculated combination of the above modified  
382 oligonucleotide and an unmodified oligonucleotide (5'-GGGCAGTACACAGACTATGTTG-  
383 <sup>3</sup>) solutions. DNA solutions were then denatured at 100°C for 5 minutes, chilled in ice for 2  
384 minutes and digested following a protocol described before (Greer et al., 2015). After  
385 centrifugal ultra-filtration (MW cut-off 3 KDa, Amicon, Millipore #UFC500396), the  
386 nucleotide solutions were assessed by Nanodrop and Qubit dsDNA-HS assay. The total amount  
387 of DNA is expected to be equal by Nanodrop measurement before and after digestion. QUBIT  
388 dsDNA-HS was used to confirm zero dsDNA in the solutions. The digested DNA solutions  
389 (samples and standards) were then injected in 2 µl of volume into an Agilent 1100 HPLC  
390 system coupled to a triple quadrupole (QQQ) 6460 mass spectrometer (Agilent Technologies  
391 Ltd, Cork, Ireland), or injected in 6 µl volume into and an Agilent 1260 HPLC system coupled  
392 to an SciEx 4500 QTrap. Analytes separation by liquid chromatography were carried out using  
393 reverse-phase Zorbax SB-C18 column (2.1 mm width x 50 mm length; 1.8 µm particles), flow  
394 rate 250 µl/min using mobile phase A (0.1% formic acid solutions in water) and mobile phase

395 B (0.1% formic acid in acetonitrile). To detect the analytes, the QQQ and the QTRAP modes  
396 were set to positive electrospray ionization and selective multiple reaction monitoring (MRM).  
397 Nucleosides were identified using the nucleoside precursor (parent) ion to product (daughter)  
398 ion mass transitions; dC (228.1/112.1), dA (252.1/136.1), 6mA (266.1/150.1) and <sup>3</sup>D<sub>1</sub>-6mA  
399 (269.1/153.1). Mol of dA and 6mA from the QQQ were interpolated from standard curve  
400 rendered from serial dilution of digested external standards. The mol 6mA from QTRAP were  
401 calculated following the previously reported guideline using the direct comparison to the <sup>3</sup>D<sub>1</sub>-  
402 6mA internal standards (Traube et al., 2019). The 6mA/dA ratio was calculated as the mol of  
403 6mA per total mol of deoxyadenosine (dA + 6mA).

#### 404 **Dot-Blot**

405 Dot-blotting was performed on 200 ng of RNA-free dsDNA solutions and standard solution  
406 from unmodified and modified oligonucleotides (0% and 0.1% 6mA/dA) as described (Greer  
407 *et al.*, 2015) on Amersham Hybond-N+ membrane (GE #RPN119B) using anti-6mA antibody  
408 (Synaptic System #202003).

#### 409 **EU Incorporation and CuAAC Reaction**

410 Cleaned embryos were incubated in 1 mM EU (Jena Bioscience #CLK-N002) for 45 minutes  
411 before being fixed in PFA+Ac solution (paraformaldehyde 4% and 0.5% freshly added glacial  
412 acetic acid (Fernández and Fuentes, 2013)) on a rocker at room temperature for 1 hour. The  
413 embryos were then rinsed in 200 mM glycine for 15 minutes, then permeabilized by PTx (3x15  
414 minutes). The embryos were then rinsed in 1 ml of 2 M HCl for 45 minutes to denature the  
415 DNA as antigen retrieval step. The HCl was washed and embryos were neutralized with 1 ml  
416 100 mM Tris-HCl pH 8.0 for 2 x 15 minutes. The embryos were then rinsed in 1 ml block-i1  
417 solution (3% BSA (MP Biomedicals #11444296) and 0.25% Triton-X (MP-Biomedicals  
418 #11471632) in 1x PBS) overnight at 4°C on a rocker, followed by CuAAC reaction.

#### 419 **CuAAC Reaction**

420 Ethynyl groups in EU/EdU act as the alkyne, which can react with fluorophore tagged azide  
421 through The Cu(I)-catalyzed alkyne-azide chemistry (CuAAC) reaction (Presolski et al., 2011).  
422 The CuAAC solutions (Jena Bioscience #CLK-074) were prepared freshly (Alexafluor488-  
423 picolylazides 2 μM, CuSO<sub>4</sub> 1 mM, THPTA 5 mM, and Na-Ascorbate 100 mM, in Sodium  
424 Phosphate buffer).

425 Next, embryos in the block-i1 solution brought back to room temperature. The block-i1  
426 solution was then replaced with 500 μl CuAAC solutions and incubated on the rocker for at

427 least 45 minutes in the dark at room temperature followed by two PTx washes. The DNA was  
428 then stained with DAPI and the embryos mounted for imaging.

#### 429 **Wholemout Immunofluorescence**

430 Embryos were incubated in 10  $\mu$ M EdU (Jena Bioscience # CLK-N001) ~45 minutes before  
431 fixed by incubation in PAGA-T (20% PEG 6000 (Sigma #81260), 4% Glycerol (Sigma  
432 #G5516), 2.5% Acetic Acid, 56% Ethanol in 100 mM Tris-HCl pH 6.0 (Invitrogen #  
433 15568025) (Zanini et al., 2012)) for 1 hour at 4°C. The fixed embryos were then washed with  
434 1:3 mixture of PAGA-T and PBS-Triton (PTx, 0.5% Triton-X in 1x PBS). Permeabilization  
435 was done by further washes the fixed embryos with PTx for 15 minutes on a rocker at room  
436 temperature for three times.

437 Samples were then treated with 1:50 RNase solution (Mixture of RNaseA, T1 and H. (20  
438 mg/ml, 1000 U/ $\mu$ l, and 10 U/ $\mu$ l, respectively)) and/or DNase (2 U/ $\mu$ l, NEB #M0303) at 37°C  
439 overnight. After one PBS wash, the embryos were rinsed in 1 ml of HCl 2 M for 45 minutes to  
440 denature the DNA as antigen retrieval step. The HCl was washed and embryos were neutralized  
441 with 1 ml 100 mM Tris-HCl pH 8.0 for 2 x 15 minutes. The embryos were then rinsed in 1 ml  
442 block-i1 solution (3% BSA and 0.25% Triton-X in PBS) for 1.5 hours at room temperature on  
443 a rocker.

444 Next, the block-i1 solution was replaced with 500  $\mu$ l CuAAC solutions (described above) then  
445 incubated on the rocker for at least 45 minutes in the dark and room temperature followed by  
446 two PTx washes. The fixed embryos were rinsed in 1 ml block-i1 solution (3% BSA in PTx)  
447 overnight at 4°C before replaced with 200  $\mu$ l of the Rabbit anti-6mA antibody solutions  
448 (diluted 1:8000 in block-i1, Synaptic Systems #202003) for one hour at room temperature.  
449 Then, the fixed embryos were washed in 1x PBS for 2x15 minutes then rinsed in 400  $\mu$ l block-  
450 i2 solution (5% goat serum (ThermoFisher #16210064) and 3% BSA in PTx) for 2 hours at  
451 room temperature. Then, embryos were soaked in anti-rabbit Alexafluor 594 antibody (1:2000  
452 in block-i2) for 1 hour at room temperature. Next, the embryos were washed three times with  
453 PBS and mounted for confocal microscope imaging.

#### 454 **Image Preparation and Quantification**

455 The mounted embryos were imaged by a confocal laser scanning microscope (Olympus  
456 FV1000). Known positive control samples were used to calibrate the confocal setup against  
457 the negative control ones (replacing primary antibody solution with blocking solutions or  
458 replacing EU/EdU soaking steps with seawater only). Once balance between the two controls



459 was achieved at particular setup, this setup was used when images taken from samples slides  
460 on the same day of image acquisition.

461 Images were imported to ImageJ software (Schneider et al., 2012). Nuclei were the region of  
462 interest (ROI), thus we used the threshold approach to select nuclear regions from the DAPI  
463 channel as the ROI. These ROIs were then used to measure the mean fluorescence intensity  
464 (MFI) and corrected to the background ROI following the standard quantitation method  
465 (Shihan et al., 2021).

466 To compare the images, we normalized all MFI of the images to be compared by defining the  
467 highest MFI in the population as 1 and the lowest MFI value as 0, thus normalized MFI value  
468 were calculated using the following equation:

$$469 \quad \text{normalized MFI} = \frac{\text{sample MFI} - \text{lowest MFI}}{\text{highest MFI} - \text{lowest MFI}}$$

470 The normalized MFI was visualized using the online software at  
471 <https://huygens.science.uva.nl/PlotsOfData/> (Postma and Goedhart, 2019).

#### 472 **SMRT-seq**

473 Raw PacBio reads from adult polyps were provided by the NIH Intramural Sequencing Center  
474 (NISC) in fastq, bax.h5, and bash.h5 format. These files were converted to BAM format using  
475 bax2bam (SMRT Analysis; <https://www.pacb.com/support/software-downloads/>). Raw  
476 PacBio reads for 16-cell and 64-cell samples were provided in BAM format. BAM files for all  
477 three samples were aligned to the assembled genome with pbalign  
478 (<https://github.com/PacificBiosciences/pbalign>) in base modification identification mode, with  
479 the command-line version using default parameters and BAM formatted output). IpdSummary  
480 of SMRT Analysis (<https://www.pacb.com/support/software-downloads/>) was used to identify  
481 6mA (using default options, with p-value 0.001, methyl fraction calculation, 6mA  
482 identification, and GFF output). The GFF output was then imported to Geneious for manual  
483 analysis. We achieved the recommended coverage (Zhu et al., 2018) in all datasets (16-cell,  
484 64-cell, and adult polyps at 73x, 117x, and 120x, respectively).

485 Afterwards, 6mAs were filtered to remove those with IPD ratio below 3.0 (Zhu *et al.*, 2018).  
486 Analysis of methylation motifs was performed with two different strategies. First, possible  
487 motifs were determined with MotifMaker using default options (SMRT Analysis;  
488 <https://www.pacb.com/support/software-downloads/>). To further confirm the lack of motif  
489 identification, all 6mA loci were separated into 20 groups based on their percent occurrence

490 (in 5% intervals), and the regions 3 bp upstream and downstream of each 6mA were extracted.  
491 MEME-ChIP (Machanick and Bailey, 2011) was then used to identify consensus sequence in  
492 each group.

### 493 **RNA extraction and m6A Detection**

494 Total RNAs was extracted from embryos of 2-4 cell, 16-32 cell, 64-128 cell stages, and 24  
495 hours post-fertilization using TRIzol solution (ThermoScientific #15596026) followed by  
496 RNA binding onto columns (EpochLifeScience #1940) and on-column DNA digestion (Qiagen  
497 #79254). RNA was then eluted with nuclease free water, assessed with a Qubit RNA HS assay  
498 and electrophoresed along with RNA loading dyes (ThermoScientific #R0641) in denaturing  
499 formaldehyde agarose gel before visualization under UV illumination. High-quality RNA was  
500 then used detect 6mA using UHPLC-QQQ after RNase A/T1 overnight digestion and  
501 ultrafiltration with MRM of A (268.1/152.1) and m6A (282.1/166.1).

### 502 **Multiple Sequence Alignment (MSA) and Phylogenetic Tree Inferences**

503 Sequences of Alkbh1 (Uniprot ID: P0CB42), N6AMT1 (Q9Y5N5), Alkbh4 (Q8MNT9), and  
504 Mettl4 (Q09956) were used as queries to retrieve orthologous sequences from a *Hydractinia*  
505 *symbiolongicarpus* transcriptome using tblastn. We retrieved the sequences of the respective  
506 homologs from each species from the uniprot database ([www.uniprot.org](http://www.uniprot.org)) and Eensembl omics  
507 database (<https://metazoa.ensembl.org/>), which were imported into Geneious Prime 2019.0.4  
508 software. We retrieved the homologous sequences of *Mnemiopsis leidyi* (NHGRI), *Hydra*  
509 *vulgaris* (NHGRI), *Hydractinia echinata* (NHGRI), *Saccoglossus kowalevskii* (OIST), and  
510 *Acropora digitifera* (OIST) from their specific respective database. Sequences were aligned in  
511 Geneious using MAFFT with the E-INS-i algorithm, a JTT PAM100 scoring matrix, and a gap  
512 penalty of 1.53 (Kato and Standley, 2013).

513 The phylogenetic trees were built as a combination of three independent inferences from  
514 multiple sequence alignments. Firstly, a phylogenetic tree was built by RAxML 8.2.11  
515 (Stamatakis, 2014) using the GAMMA LG protein model (default), rapid bootstrapping  
516 (10,000 replicates) and searching for best-scoring maximum likelihood tree algorithm.  
517 Secondly, a Bayesian phylogenetic tree was produced using MrBayes v.3.2.2 (Ronquist et al.,  
518 2012). The program was run using a fixed WAG substitution model (recommended by  
519 MrBayes trial with the respective MSA with 500 generations and sampled every 50<sup>th</sup>  
520 generation) with gamma distributed rate variation across sites (“lset rates=gamma”) with four  
521 chains for 4 million generations. The run was sampled every 500<sup>th</sup> generation and analysed  
522 with a 20% burn-in. These two methods of phylogenetic tree inference are available in

523 Geneious. The consensus tree from maximum likelihood analysis was then exported and  
524 manually edited in InkScape to mark the nodes with support values as annotated from the two  
525 different methods of phylogenetic inference with greyscale dots.

## 526 **Localization Signal**

527 Sequences from *Hydractinia symbiolongicarpus* and *Homo sapiens* homologous proteins were  
528 analysed for nuclear localisation signals by cNLS Mapper (Kosugi et al., 2009), by NLSdb  
529 (Bernhofer et al., 2018) and for protein sorting in general by Wolf Psort (Horton et al., 2007).  
530 The results retrieved and imported to Microsoft Excel for data visualization and presented as  
531 Table S2.

## 532 ***Alkbh1* knockdown and rescue experiment**

533 Short-hairpin RNA were designed according to a previous report (DuBuc et al., 2020). T7 IVT  
534 kit was used to synthesize mRNA to confirm the efficacies of *shAlkbh1* by adding the  
535 endogenous target of *Alkbh1* sequences at the 3' of *mScarlet* coding sequence. Rescue *Alkbh1*  
536 mRNA was designed by introducing four silent mutations, T861C, A864G, C865T, and A867G  
537 to render it unrecognizable by *shAlkbh1*.

| Name                                  | Sequences                                                         |
|---------------------------------------|-------------------------------------------------------------------|
| shGfp                                 | GGAUGACGCGAUCUGCAAGACA <u>AUUUACU</u> UGUCUUGUAGUCCCC<br>GUCAUCUU |
| shMettl4                              | GAGAACUCUGCUAGGUACUCA <u>AUUUACU</u> UGAGUACGUAACAGAG<br>UUCUCUU  |
| shN6amt1                              | GCUUCAUAUGGCAGUGUCAA <u>AUUUACU</u> UUGAAGAGUGGGCAUUAU<br>GAAGCUU |
| shAlkbh1                              | GGCUCAUGUGCAGUAGUCACU <u>AUUUACU</u> AGUGACUAGUGGACAU<br>GAGCCUU  |
| Endogenous<br>target of Alkbh1        | GGCTCATGTCCACTAGTCACT                                             |
| 4-point mutation<br>on rescue<br>mRNA | GGCTCATGCCCGTTGGTCACT                                             |

538 **Mismatches/mutation, loop, UU dinucleotide tail.**

## 539 **Microinjection**

540 Fertilized eggs were transferred to a Petri dish coated with 200-micron Nitex mesh screen.  
541 Zygotes are 180-200 microns and settled in the holes. Cells were injected, prior to first

542 cleavage, using a Narishige IM 300 microinjection system. To delay cleavage, zygotes were  
543 stored on ice prior to injection.

#### 544 **Electroporation**

545 Zygotes were rigorously cleaned with filtered-sterile seawater then electroporated to insert  
546 *shAlkbh1* into the cell following the previously described protocol (Quiroga-Artigas et al.,  
547 2020) with Ficoll replaced by 1.54 M Mannitol. Next, zygotes were immediately transferred  
548 into a large volume of filtered-sterile seawater in glass Petri dish and left at room temperature  
549 for 1 hour before further cleaning and then used for DNA extraction, DNA digestion, and  
550 UHPLC-QTRAP protocols as described above.

#### 551 **Hydroxyurea treatment**

552 Cleaned 2-cell stage embryos were incubated in sea water with 10 mM Hydroxyurea (HU) and  
553 collected at the 256/512-cell stage, while the negative control embryos were incubated only in  
554 seawater. Both the HU-treated embryos and negative control were soaked in hoescht-33342  
555 (diluted 1:2000 in seawater) for 15 minutes then mounted for image acquisition on an  
556 epifluorescence microscope.

#### 557 **References**

- 558 Bernhofer, M., Goldberg, T., Wolf, S., Ahmed, M., Zaugg, J., Boden, M., and Rost, B. (2018).  
559 NLSdb-major update for database of nuclear localization signals and nuclear export  
560 signals. *Nucleic Acids Research* *46*, D503-D508.
- 561 DuBuc, T.Q., Schnitzler, C.E., Chrysostomou, E., McMahon, E.T., Febrimarsa, Gahan, J.M.,  
562 Buggie, T., Gornik, S.G., Hanley, S., Barreira, S.N., et al. (2020). Transcription factor  
563 AP2 controls cnidarian germ cell induction. *Science* *367*, 757-762.  
564 10.1126/science.aay6782.
- 565 Fernández, J., and Fuentes, R. (2013). Fixation/Permeabilization: New Alternative Procedure  
566 for Immunofluorescence and mRNA In Situ Hybridization of Vertebrate and Invertebrate  
567 Embryos. *Developmental Dynamics* *242*, 503-517.
- 568 Frank, U., Nicotra, M.L., and Schnitzler, C.E. (2020). The colonial cnidarian *Hydractinia*.  
569 *Evodevo II*. 10.1186/s13227-020-00151-0.
- 570 Greer, E.L., Blanco, M.A., Gu, L., Sendinc, E., Liu, J., Aristizábal-Corrales, D., Hsu, C.-H.,  
571 Aravind, L., He, C., and Shi, Y. (2015). DNA methylation on N6-adenine in *C. elegans*.  
572 *Cell* *161*, 868-878.
- 573 Horton, P., Park, K.-J., Obayashi, T., Fujita, N., Harada, H., Adams-Collier, C.J., and Nakai,  
574 K. (2007). WoLF PSORT: protein localization predictor. *Nucleic acids research* *35*,  
575 W585-587.
- 576 Katoh, K., and Standley, D.M. (2013). MAFFT multiple sequence alignment software version  
577 7: improvements in performance and usability. *Mol Biol Evol* *30*.  
578 10.1093/molbev/mst010.
- 579 Kosugi, S., Hasebe, M., Tomita, M., and Yanagawa, H. (2009). Systematic identification of  
580 cell cycle-dependent yeast nucleocytoplasmic shuttling proteins by prediction of  
581 composite motifs. *Proceedings of the National Academy of Sciences* *106*, 10171-10176.

- 582 Machanick, P., and Bailey, T.L. (2011). MEME-ChIP: motif analysis of large DNA datasets.  
583 *Bioinformatics* 27, 1696-1697.
- 584 Postma, M., and Goedhart, J. (2019). PlotsOfData - A web app for visualizing data together  
585 with their summaries. *PLoS Biology* 17, e3000202.
- 586 Presolski, S., Hong, P.V., and Finn, M.G. (2011). Copper-catalyzed Azide-Alkyne Click  
587 Chemistry for Bioconjugation. *Current Protocols in Chemical Biology* 3, 153-162.
- 588 Quiroga-Artigas, G., Duscher, A., Lundquist, K., Waletich, J., and Schnitzler, C.E. (2020).  
589 Gene knockdown via electroporation of short hairpin RNAs in embryos of the marine  
590 hydroid *Hydractinia symbiolongicarpus*. *Scientific reports* 10. 10.1038/s41598-020-  
591 69489-8.
- 592 Ronquist, F., Teslenko, M., Van Der Mark, P., Ayres, D.L., Darling, A., Hóhna, S., Larget, B.,  
593 Liu, L., Suchard, M.A., and Huelsenbeck, J.P. (2012). MrBayes 3.2: efficient Bayesian  
594 phylogenetic inference and model choice across a large model space. *Systematic Biology*  
595 61, 539-542.
- 596 Schneider, C.A., Rasband, W., and Eliceiri, K. (2012). NIH Image to ImageJ: 25 years of image  
597 analysis. *Nature Methods* 9, 671-675.
- 598 Shihan, M.H., Novo, S.G., Le Marchand, S.J., Wang, Y., and Duncan, M.K. (2021). A simple  
599 method for quantitating confocal fluorescent images. *Biochemistry and Biophysics*  
600 *Reports* 25, e100916.
- 601 Stamatakis, A. (2014). RAxML version 8: a tool for phylogenetic analysis and post-analysis of  
602 large phylogenies. *Bioinformatics* 30, 1312-1313.
- 603 Traube, F.R., Schiffers, S., Iwan, K., Kellner, S., Spada, F., Müller, M., and Carell, T. (2019).  
604 Isotope-dilution mass spectrometry for exact quantification of noncanonical DNA  
605 nucleosides. *Nature Protocols* 14, 283-312. 10.1038/s41596-018-0094-6.
- 606 Zanini, C., Gerbaudo, E., Ercole, E., Vendramin, A., and Forni, M. (2012). Evaluation of two  
607 commercial and three home-made fixatives for the substitution of formalin: a  
608 formaldehyde-free laboratory is possible. *Environmental Health* 11, 59.
- 609 Zhu, S., Beaulaurier, J., Deikus, G., Wu, T.P., Strahl, M., Hao, Z., Luo, G., Gregory, J.A.,  
610 Chess, A., He, C., et al. (2018). Mapping and characterizing N6-methyladenine in  
611 eukaryotic genomes using single-molecule real-time sequencing. *Genome Research* 28,  
612 1067-1078.
- 613
- 614
